# Supplementary material for: Humidity-Controlled Sorbents for Efficient Cation Separation
Source: Research Square preprint supplement (doi:10.21203/rs.3.rs-5235953/v1), 2025-03-18
Supplement: Supplementary file 1 [file fe26ff55b8aa7ac6d2a0561b.docx]

**Humidity-Controlled Sorbents for Efficient Cation Separation**

Jinjiang Liang1, Xin Chen1, Yining Zhang1, Jiahao Feng1, Xinshui Zhang1, Ning Xue1, Yihang Yang1, Tianyi Gao1, Ran Wei1, Jiameng Yu1, Chenxiang Hu1,2, Yue Zhang1,2, Yi Yu1,2, Wei Liu1,2*

1School of Physical Science and Technology, ShanghaiTech University, Shanghai 201210, China.

2Shanghai Key Laboratory of High-resolution Electron Microscopy, ShanghaiTech University; Shanghai, 201210, China

*Corresponding author. Email: liuwei1@shanghaitech.edu.cn (W.L.)

**Supporting Notes**

**Note S1**

There are generally two ways to express the water vapor content in the air: one is by the partial pressure of water vapor, and the other is by relative humidity, which represents the percentage of the current water vapor partial pressure relative to the saturation vapor pressure of water at a given temperature. As the temperature increases, the saturation vapor pressure of water rises continuously (as shown by the blue line), and the saturation vapor pressure of salt solutions also increases (Fig 1c). However, the relative humidity does not significantly change with temperature (as shown in Supplementary Fig. 1). In fact, measuring water vapor partial pressure is quite challenging and varies significantly with temperature, making it difficult to control, measure, and describe the water vapor content in experiments. In contrast, relative humidity is easier to measure, and the equilibrium relative humidity of different salts does not vary significantly with temperature. Therefore, relative humidity is used in experiments to describe the water vapor content in the environment.

**Note S2**

The separation and purification of different ions are achieved by controlling the relative humidity. Specifically, the selectivity of ions is essentially determined by the ion activity product between different salts. When the humidity is controlled to allow only lithium chloride to deliquesce, the resulting lithium chloride solution is nearly saturated. According to inductively coupled plasma optical emission spectrometry (ICP) results, at 25°C and 40% relative humidity, the deliquescence concentration of lithium chloride is 7.35 mol L⁻¹, while the concentrations of saturated sodium chloride and saturated potassium chloride are 6.14 mol L⁻¹ and 4.58 mol L⁻¹, respectively. This difference inhibits the dissolution of impurity salts, thereby allowing the purification of lithium chloride. Additionally, the lower the relative humidity, the higher the concentration of the deliquesced solution, and the better the purification effect.

**Note S3**

Due to the composite sorbent being significantly larger than the maximum field of view that can be captured by an electron microscope, it is not feasible to image the entire cross-section of the beads in a single shot. To address this, we maintained all parameters constant while capturing electron microscope images and element distribution maps. We took an 88 grid of images at 500 μm intervals in the x and y directions. Subsequently, we used Python to stitch the collected images together, resulting in a clear and complete view of the composite sorbent (Fig. 3a).

**Note S4**

Currently, compared to the industrial evaporation pond method for lithium extraction, excluding labor and equipment costs, the cost is approximately $7,087 ton-1 LCE1. In 100 cycles, an average of 1 g of sorbent can extract 11.49 g of Li, requiring approximately 72 m3 of air with 40% RH. According to data from the China Meteorological Data Service Centre2, the average daytime relative humidity in Tibet, Xinjiang, and Qinghai (the main distribution areas of salt lakes) is below 40%. This means that ambient air can be directly used during lithium extraction, so the main energy consumption comes from air transportation. Using industrial fans to transport air is highly energy-efficient. Large industrial fans can move 30,000 m3 of air per hour with a power consumption of only 0.37 kW, resulting in an energy consumption of just 0.077 kWh kg-1 Li. The industrial electricity price in China is about $0.087 kWh-1, resulting in an energy cost of approximately $6.699 ton-1 of Li extracted. Additionally, the industrial prices of PAN, CS, and DMF are $1,269 ton-1, $1,551 ton-1, and $578 ton-1, respectively. Extracting one ton of lithium requires 58.00 kg of PAN, 29.00 kg of CS, and 548.10 kg of DMF, leading to the cost of raw materials is $435.38 tonLi-1 for lithium extraction (equivalent to $81.89 ton-1 LCE), excluding labor and equipment costs.

**Note S5**

Accurately predicting the vapor pressure of a single-solute solution is quite challenging. The current approach primarily involves experimentally measuring the vapor pressure at different temperatures and concentrations, fitting the obtained data, and using empirical formulas to predict the solution's vapor pressure. Consequently, theoretically predicting the vapor pressure of a binary solute solution becomes even more difficult. Therefore, we performed theoretical calculations of the vapor pressure of LiCl and NaCl mixed solutions using an ideal model—Raoult's law:

Psol is , PLiCl is the vapor pressure corresponding to a lithium chloride solution with the same concentration as the mixed solution, XLiCl is the mole fraction of lithium chloride, PNaCl is the vapor pressure corresponding to a sodium chloride solution with the same concentration as the mixed solution, XNaCl is the mole fraction of sodium chloride. We know that the relative humidity multiplied by the saturation vapor pressure of water gives the partial pressure of water vapor. Therefore, the relative humidity can be expressed by the following relationship:

Although the actual humidity of the solution may exhibit positive or negative deviations from the theoretical calculations, this does not affect the overall trend. Therefore, qualitative analysis can still be performed based on the calculated results.

**Supporting Figures:**

**
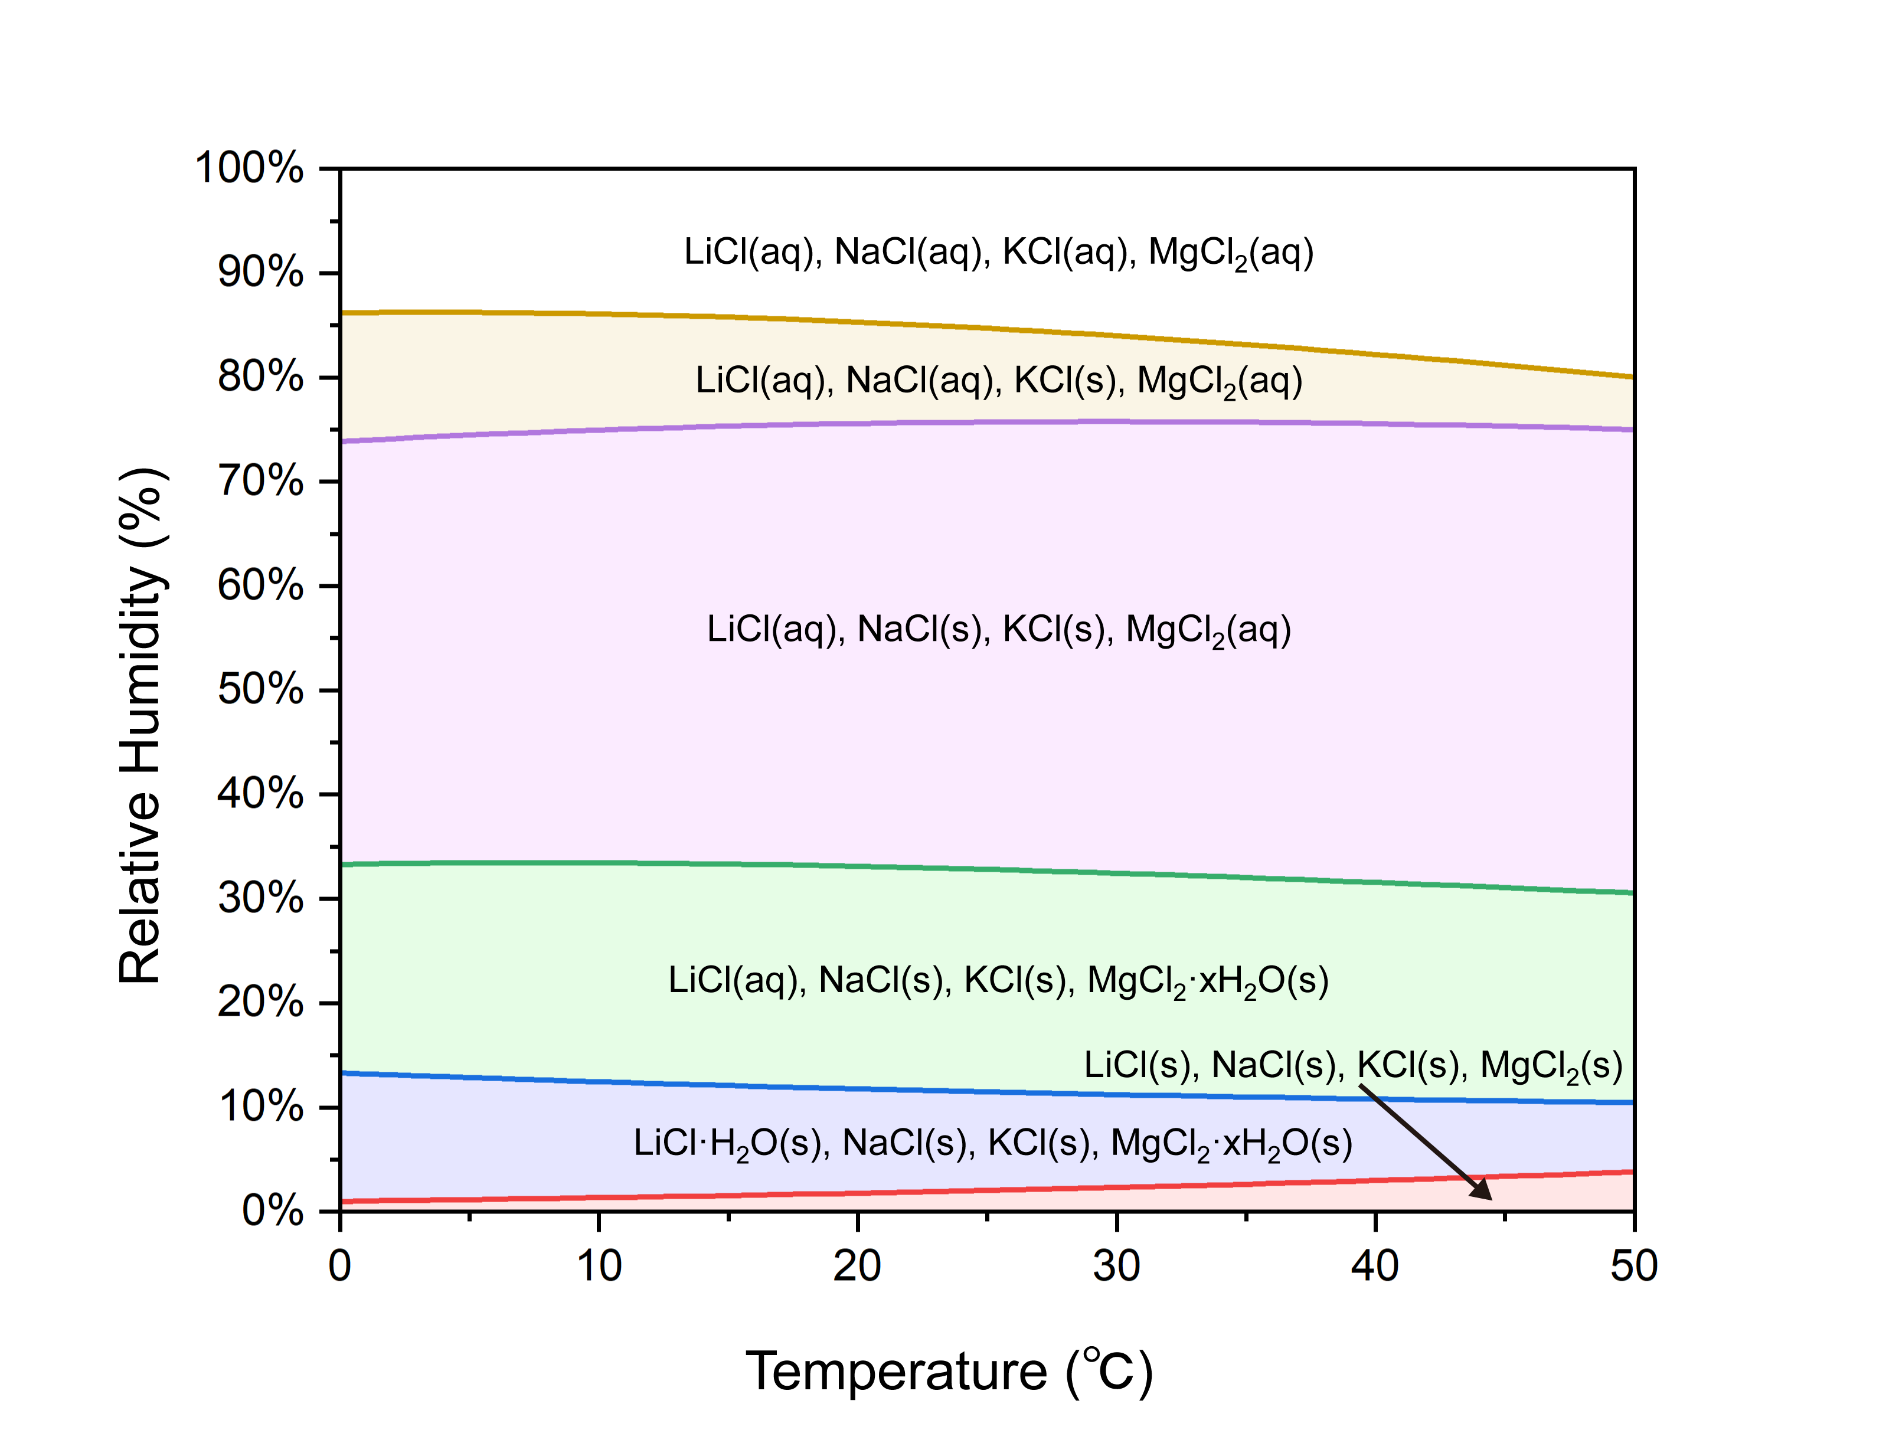
**

**Supplementary Figure 1 | The states of LiCl, NaCl, KCl and MgCl2 under different relative humidity.** At 25 °C, the relative humidity of 11-33% can selectively extract LiCl, 33-75% can selectively extract MgCl2 and 75-84% can selectively extract NaCl


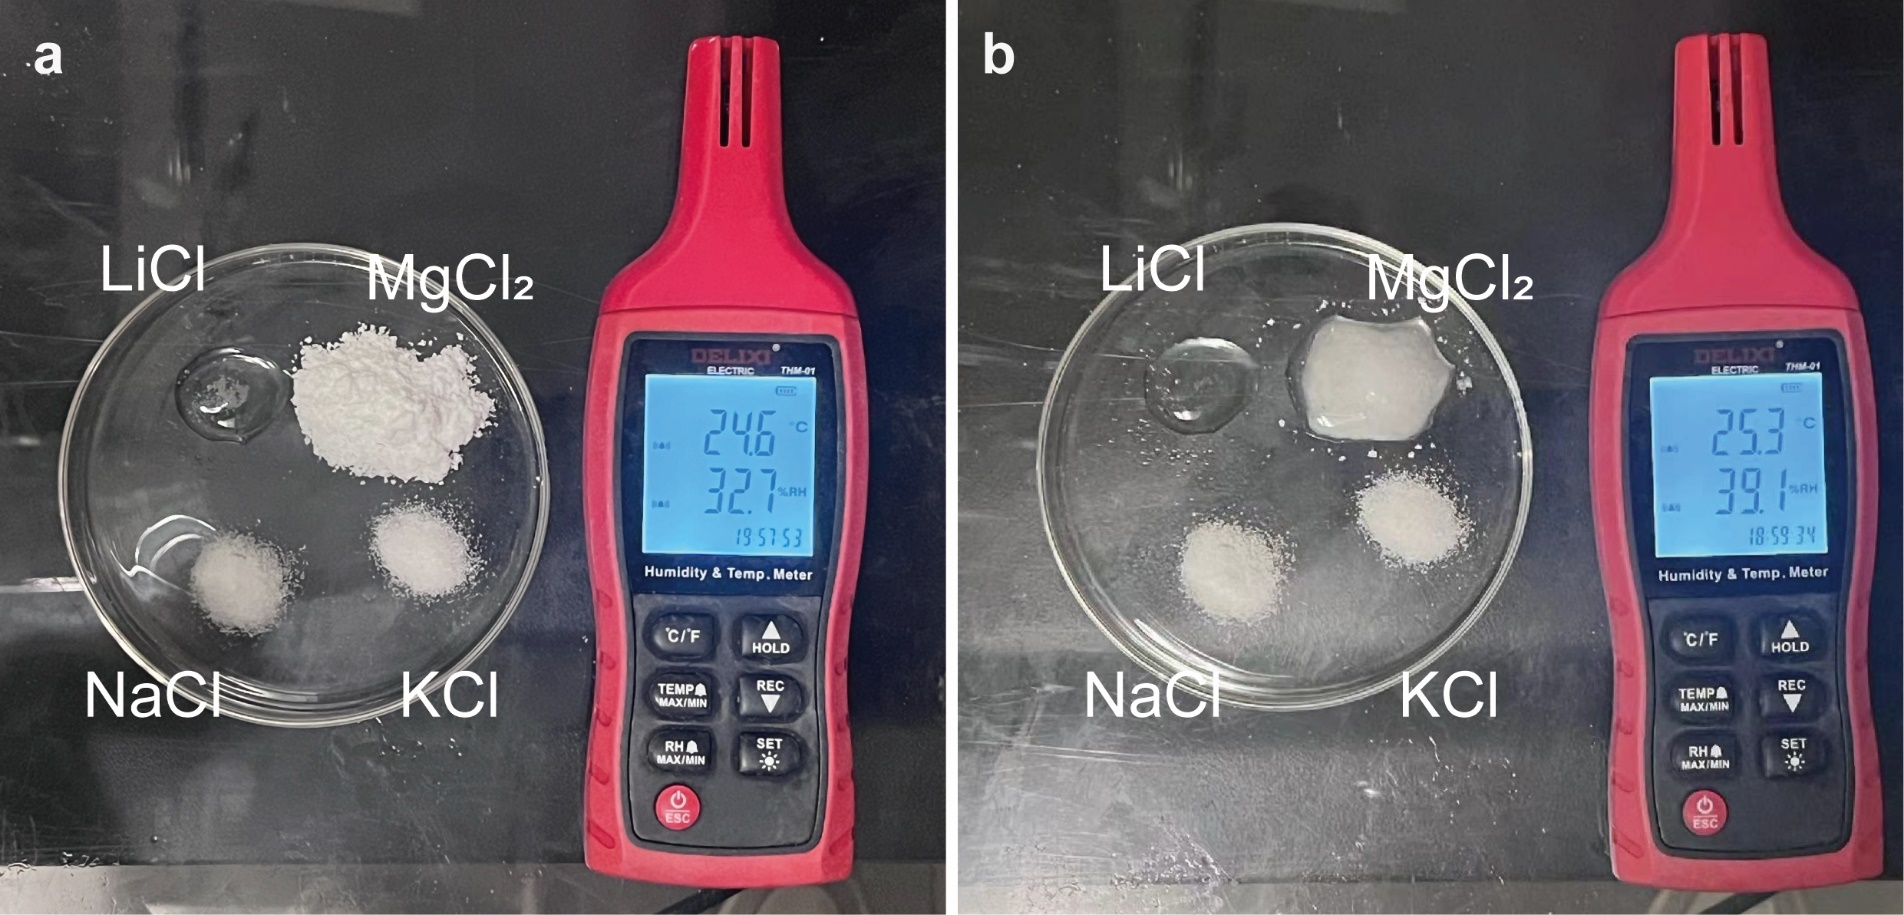


**Supplementary Figure 2 | Humidity absorption of LiCl, NaCl, KCl and MgCl2. a**,At low humidity (RH < 33%), LiCl absorbs moisture and becomes a LiCl solution, while NaCl, KCl and MgCl2 remain solid. **b**, When the RH is controlled between 33% and 75%, LiCl and MgCl₂ are in a liquefied state, while NaCl and KCl remain solid.

**
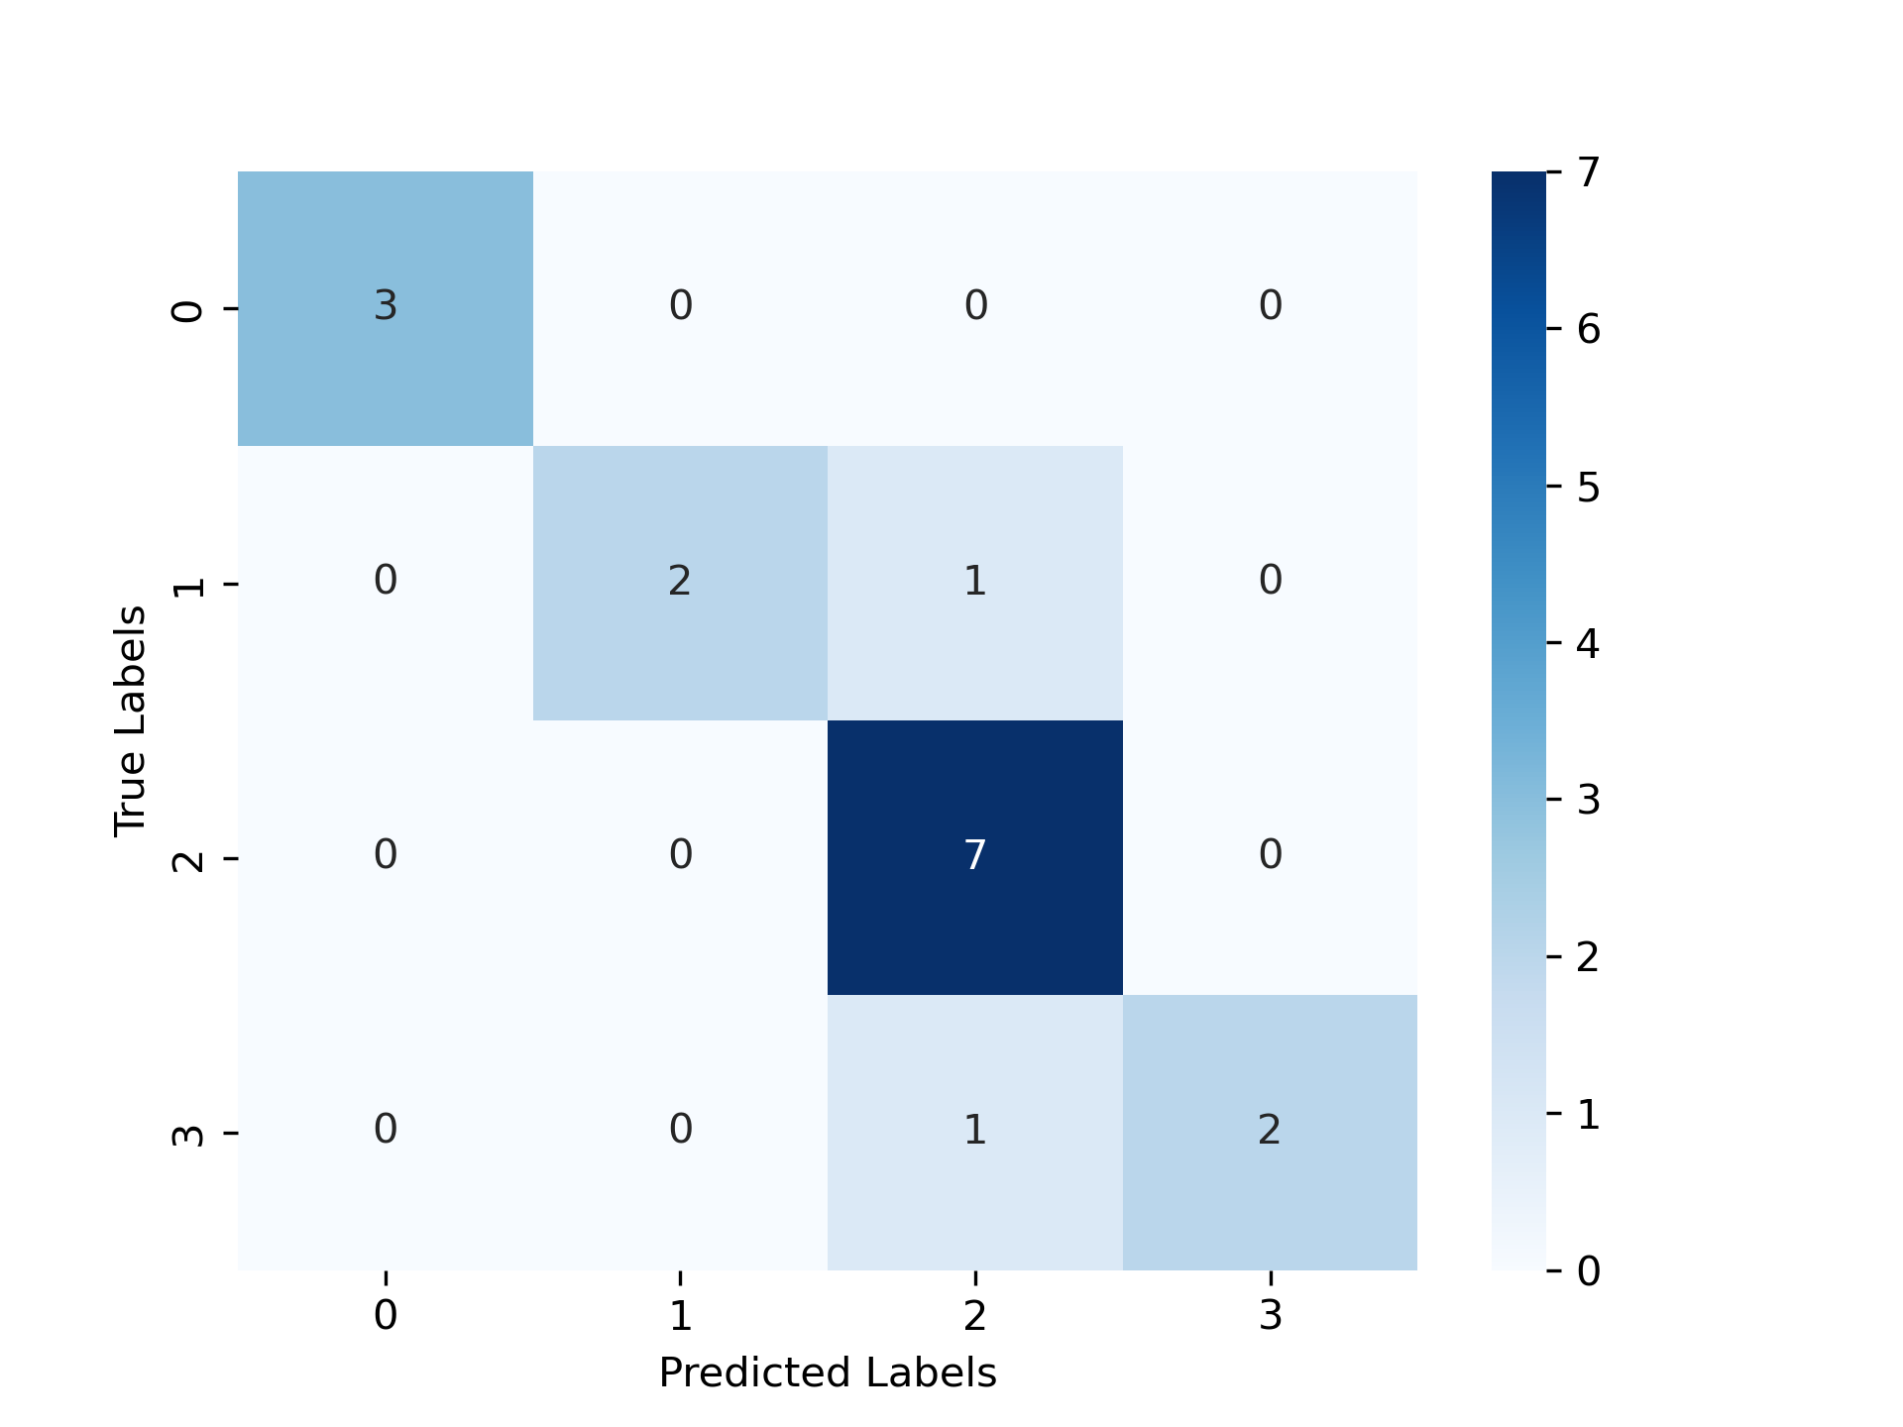
**

**Supplementary Figure 3 | Confusion matrix.** The performance of the sklearn's linear model on test set is presented.


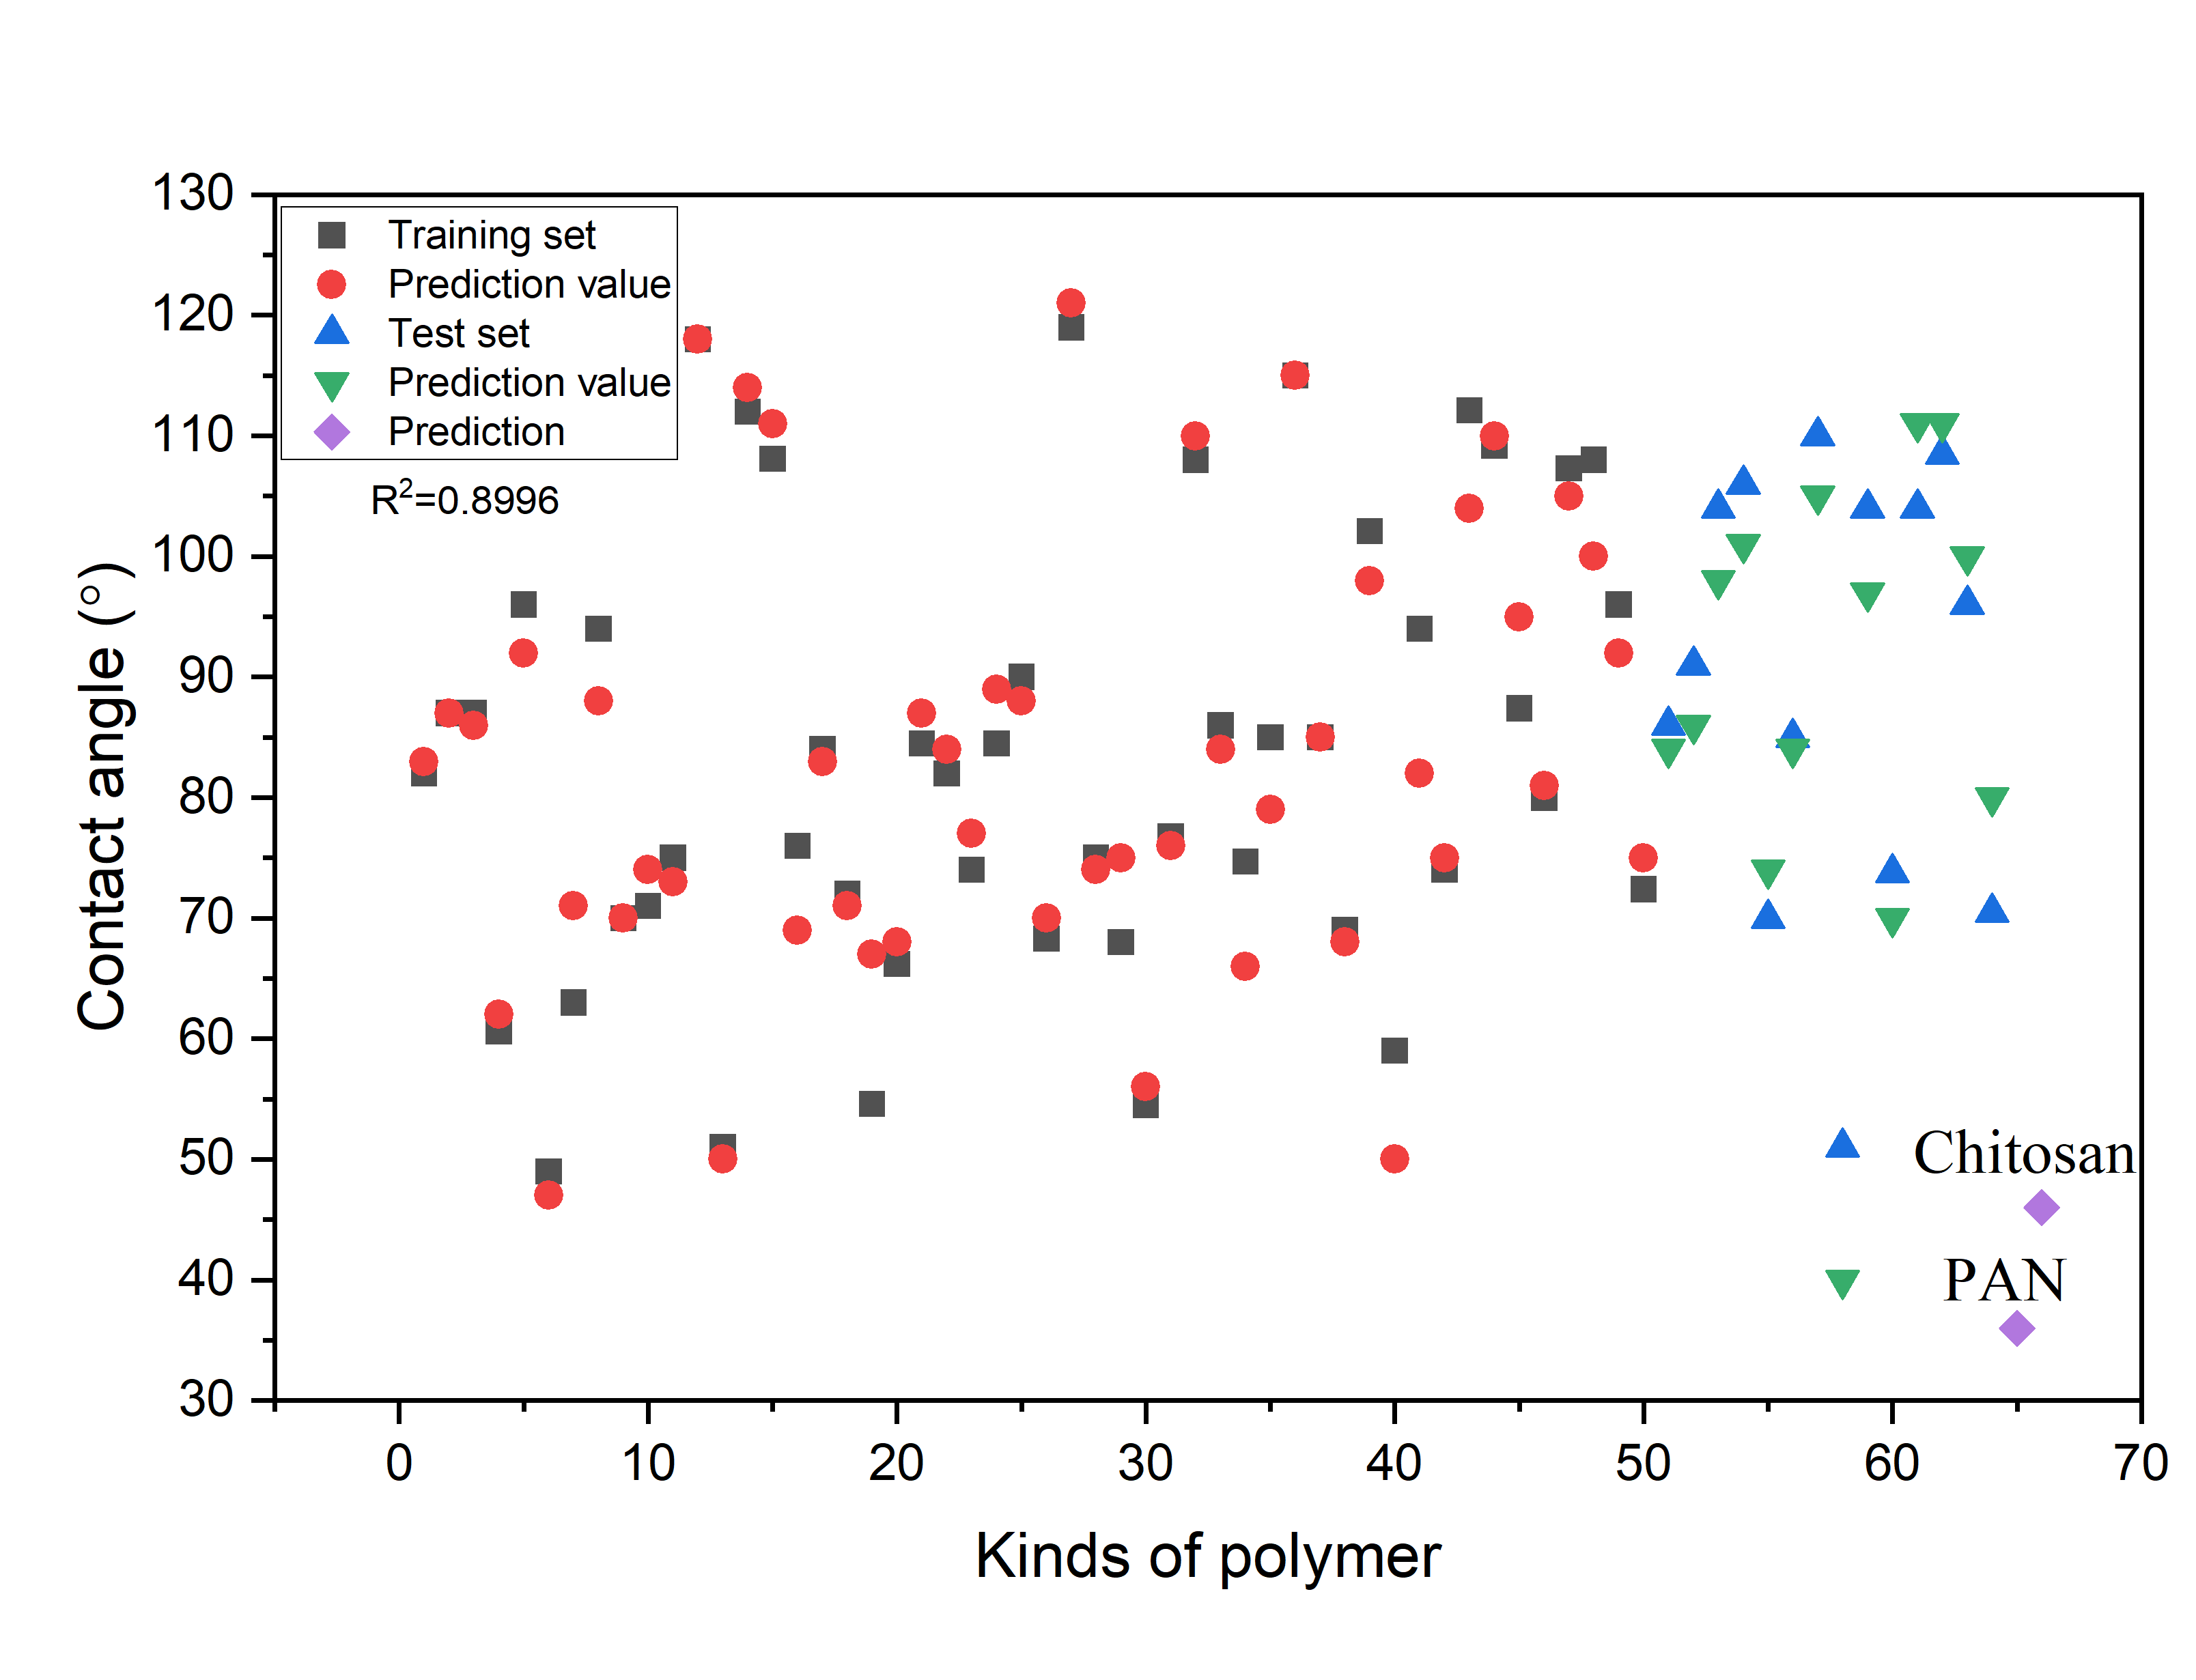


**Supplementary Figure 4 |** Performance of linear regression model in the training and test sets of polymer contact angles. The contact angle between polyacrylonitrile and chitosan was predicted.


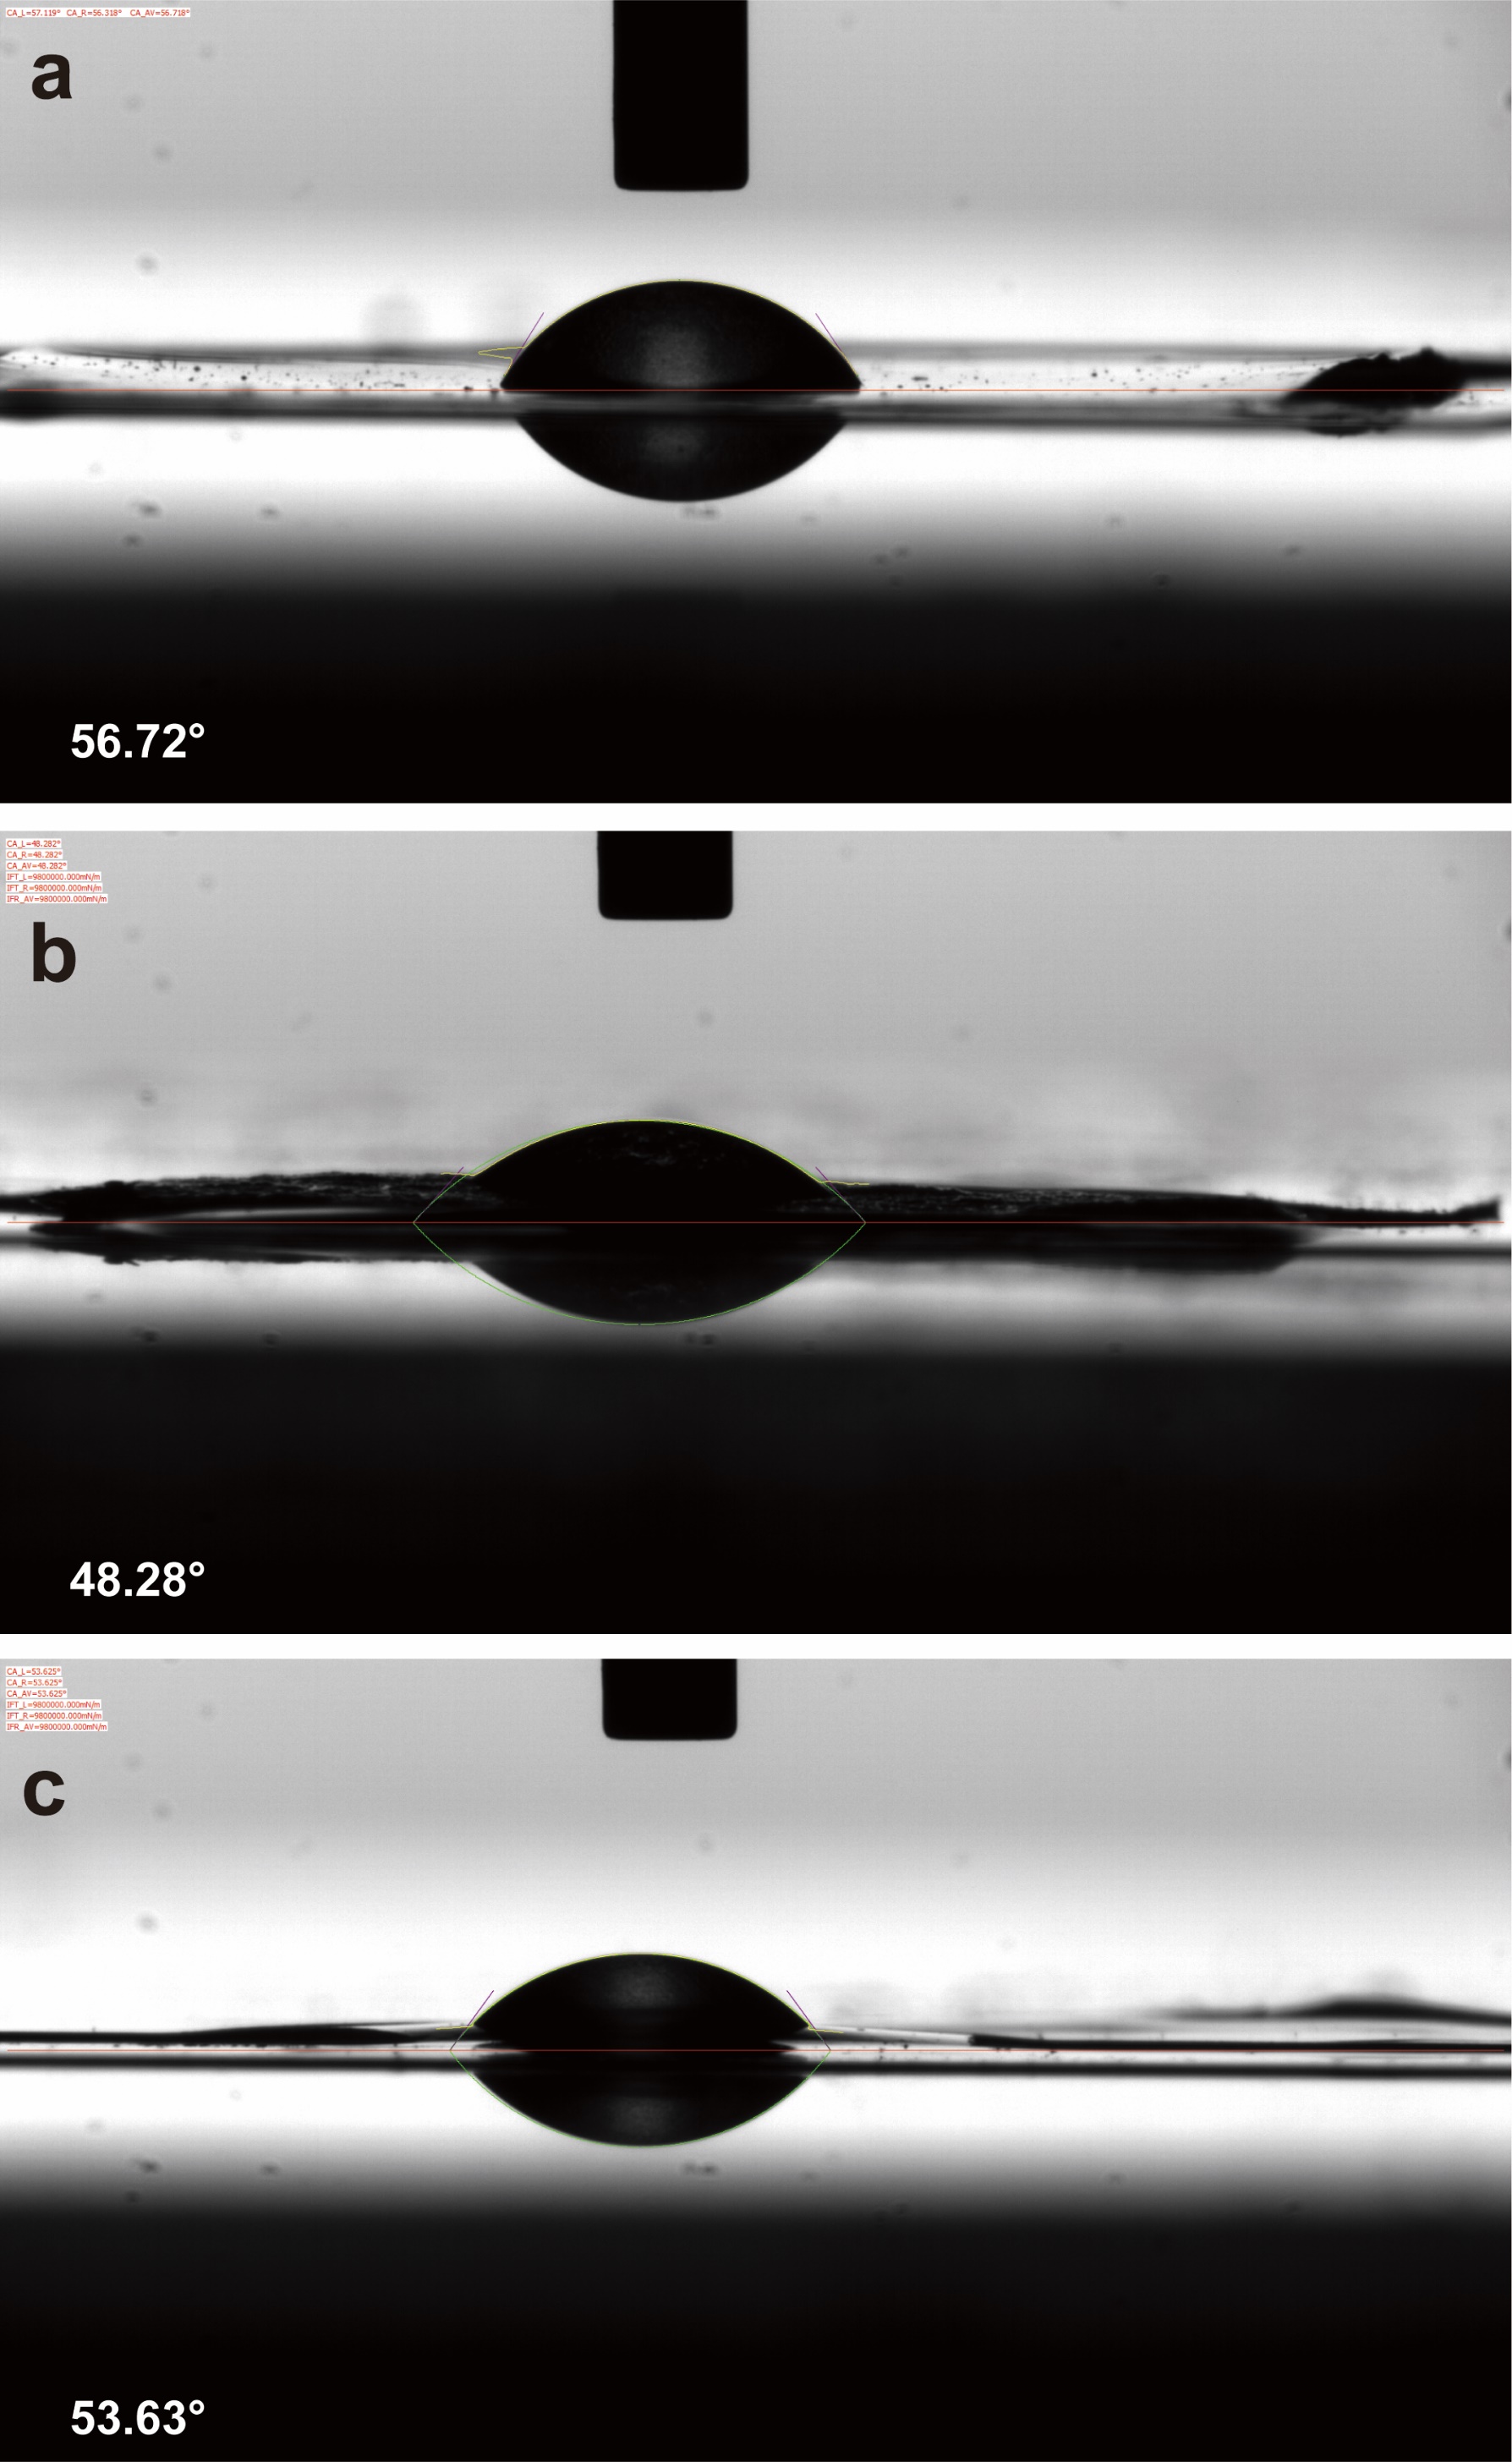


**Supplementary Figure 5 | Contact Angle of a,** polypropylene, **b,** chitosan, and **c,** polypropylene-chitosan composite film


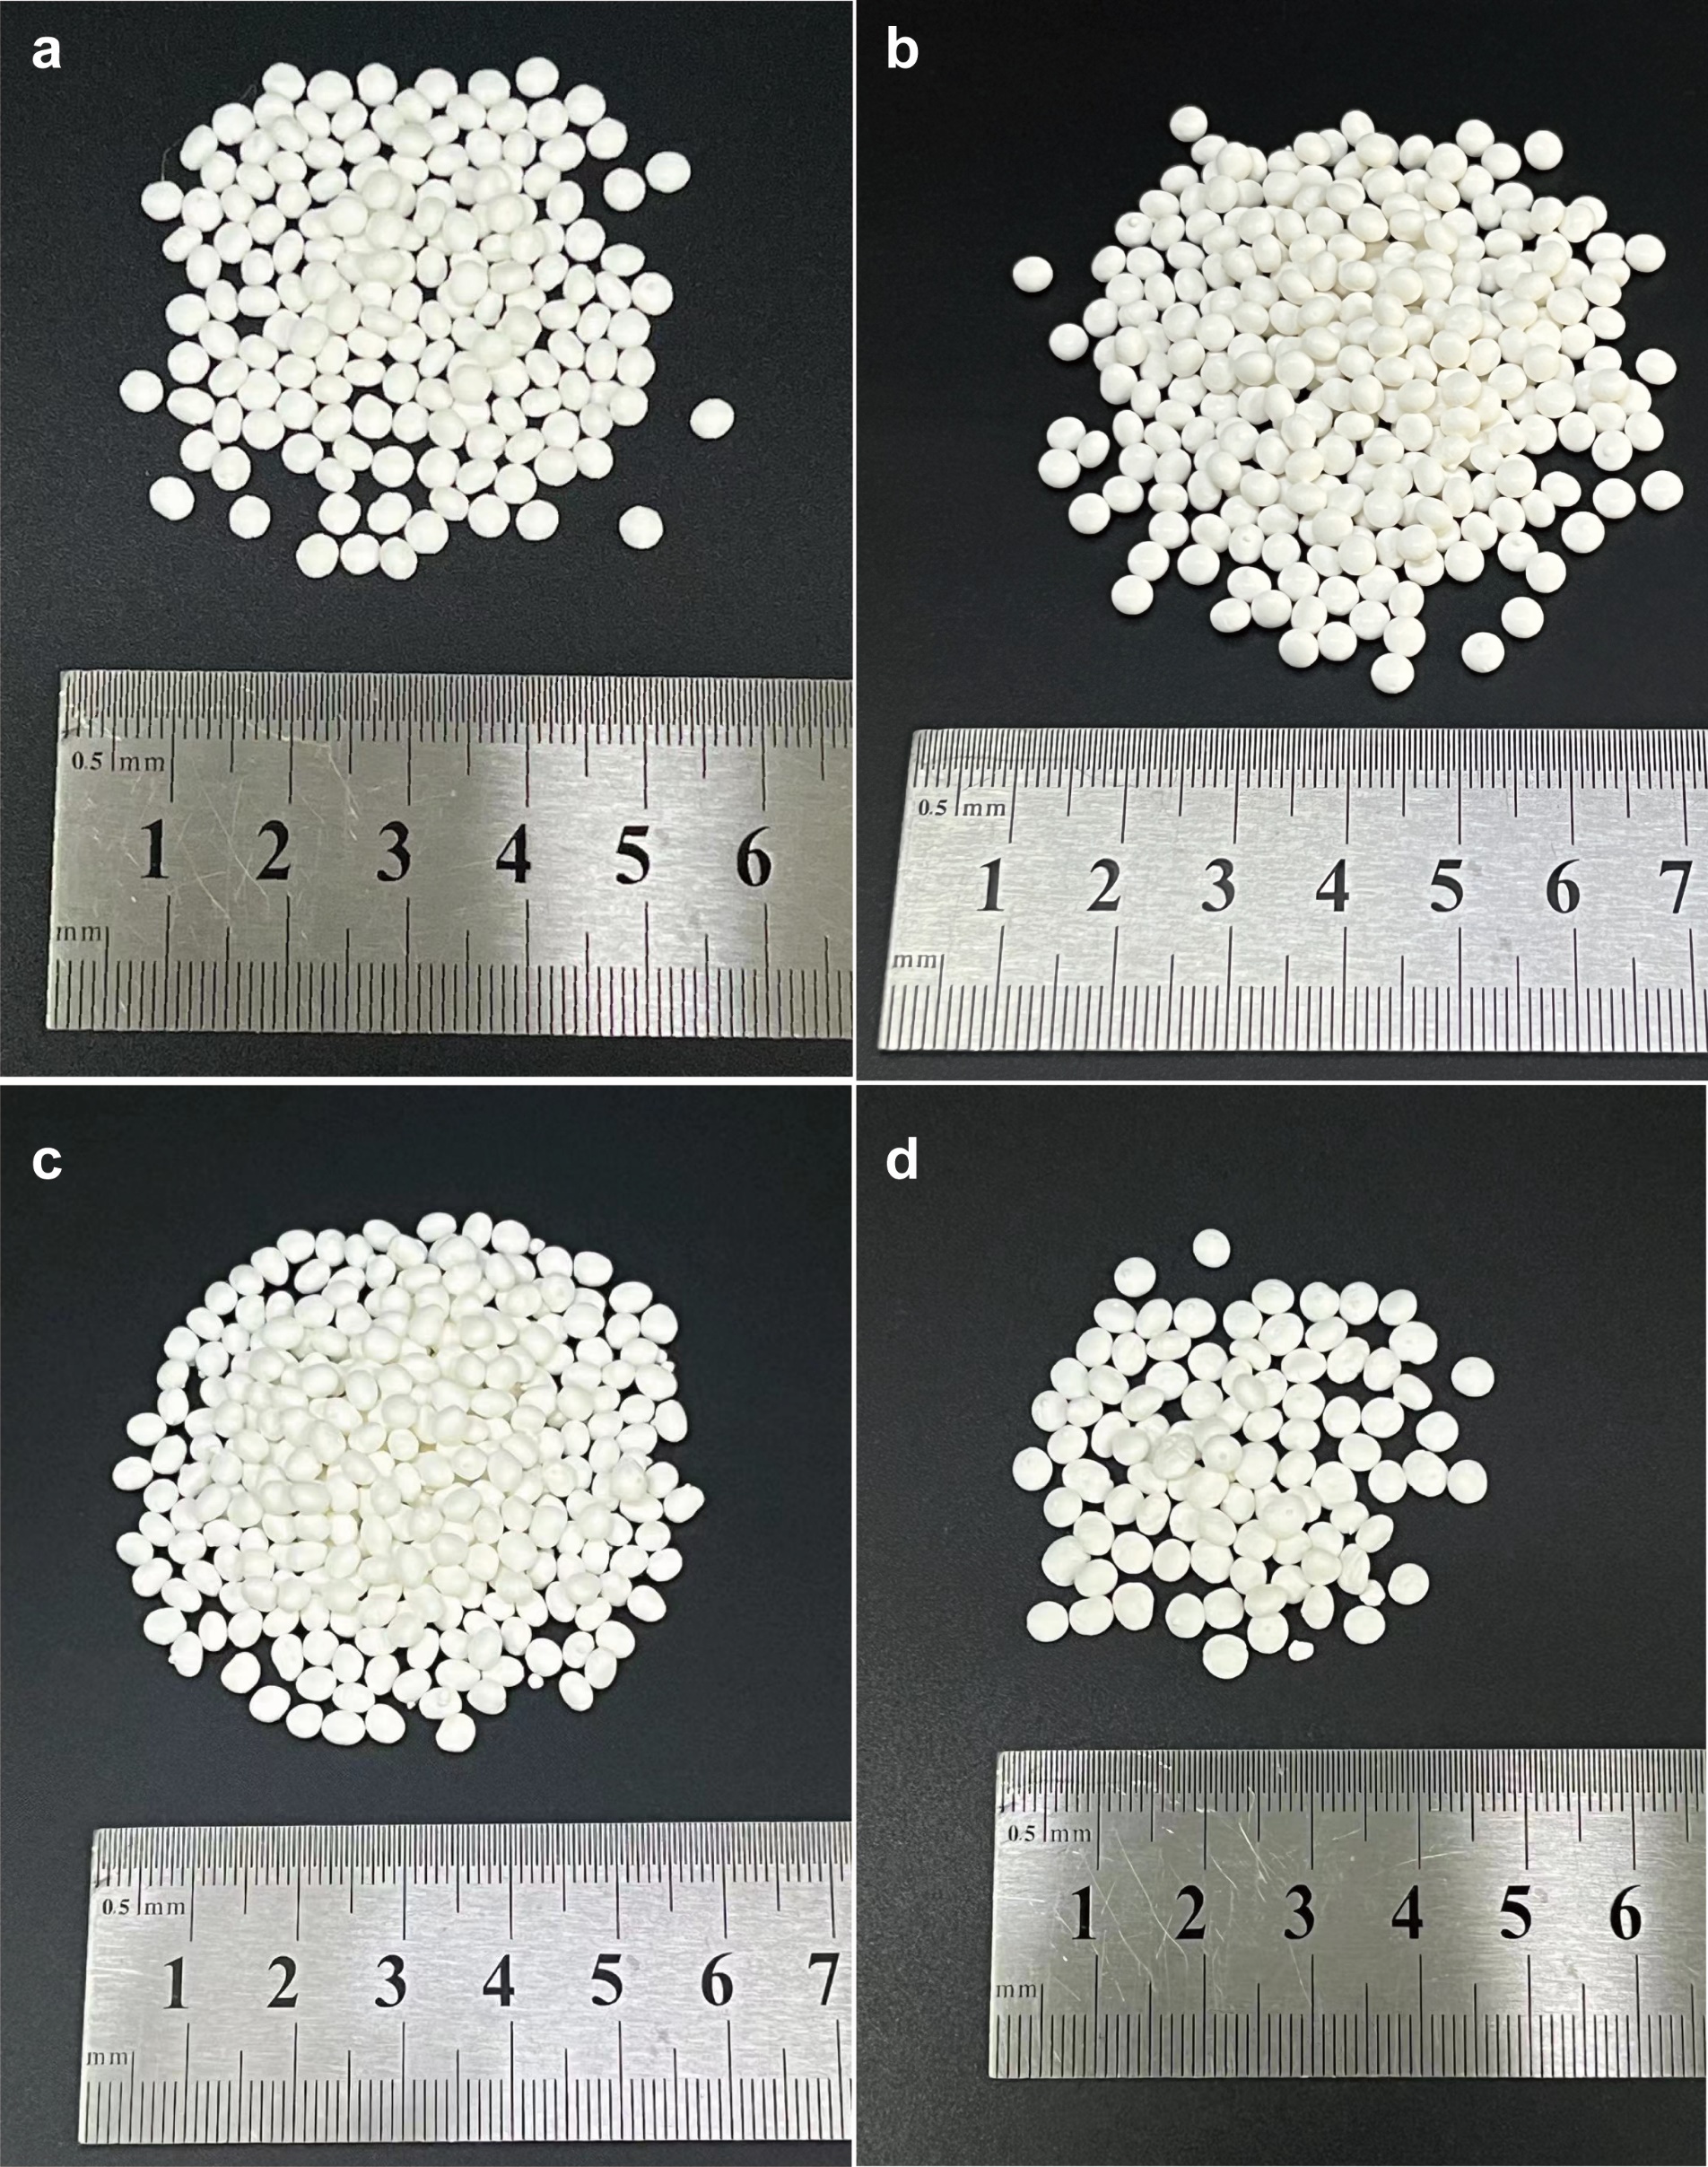


**Supplementary Figure 6 | Four kinds of polymer adsorption spheres were synthesized. a**, Polyacrylonitrile adsorption ball **b**, Polyacrylonitrile-chitosan composite adsorption sphere **c**, Polyacrylonitrile-ethyl cellulose composite adsorption sphere **d**, Polyacrylonitrile-cellulose acetate composite adsorption ball


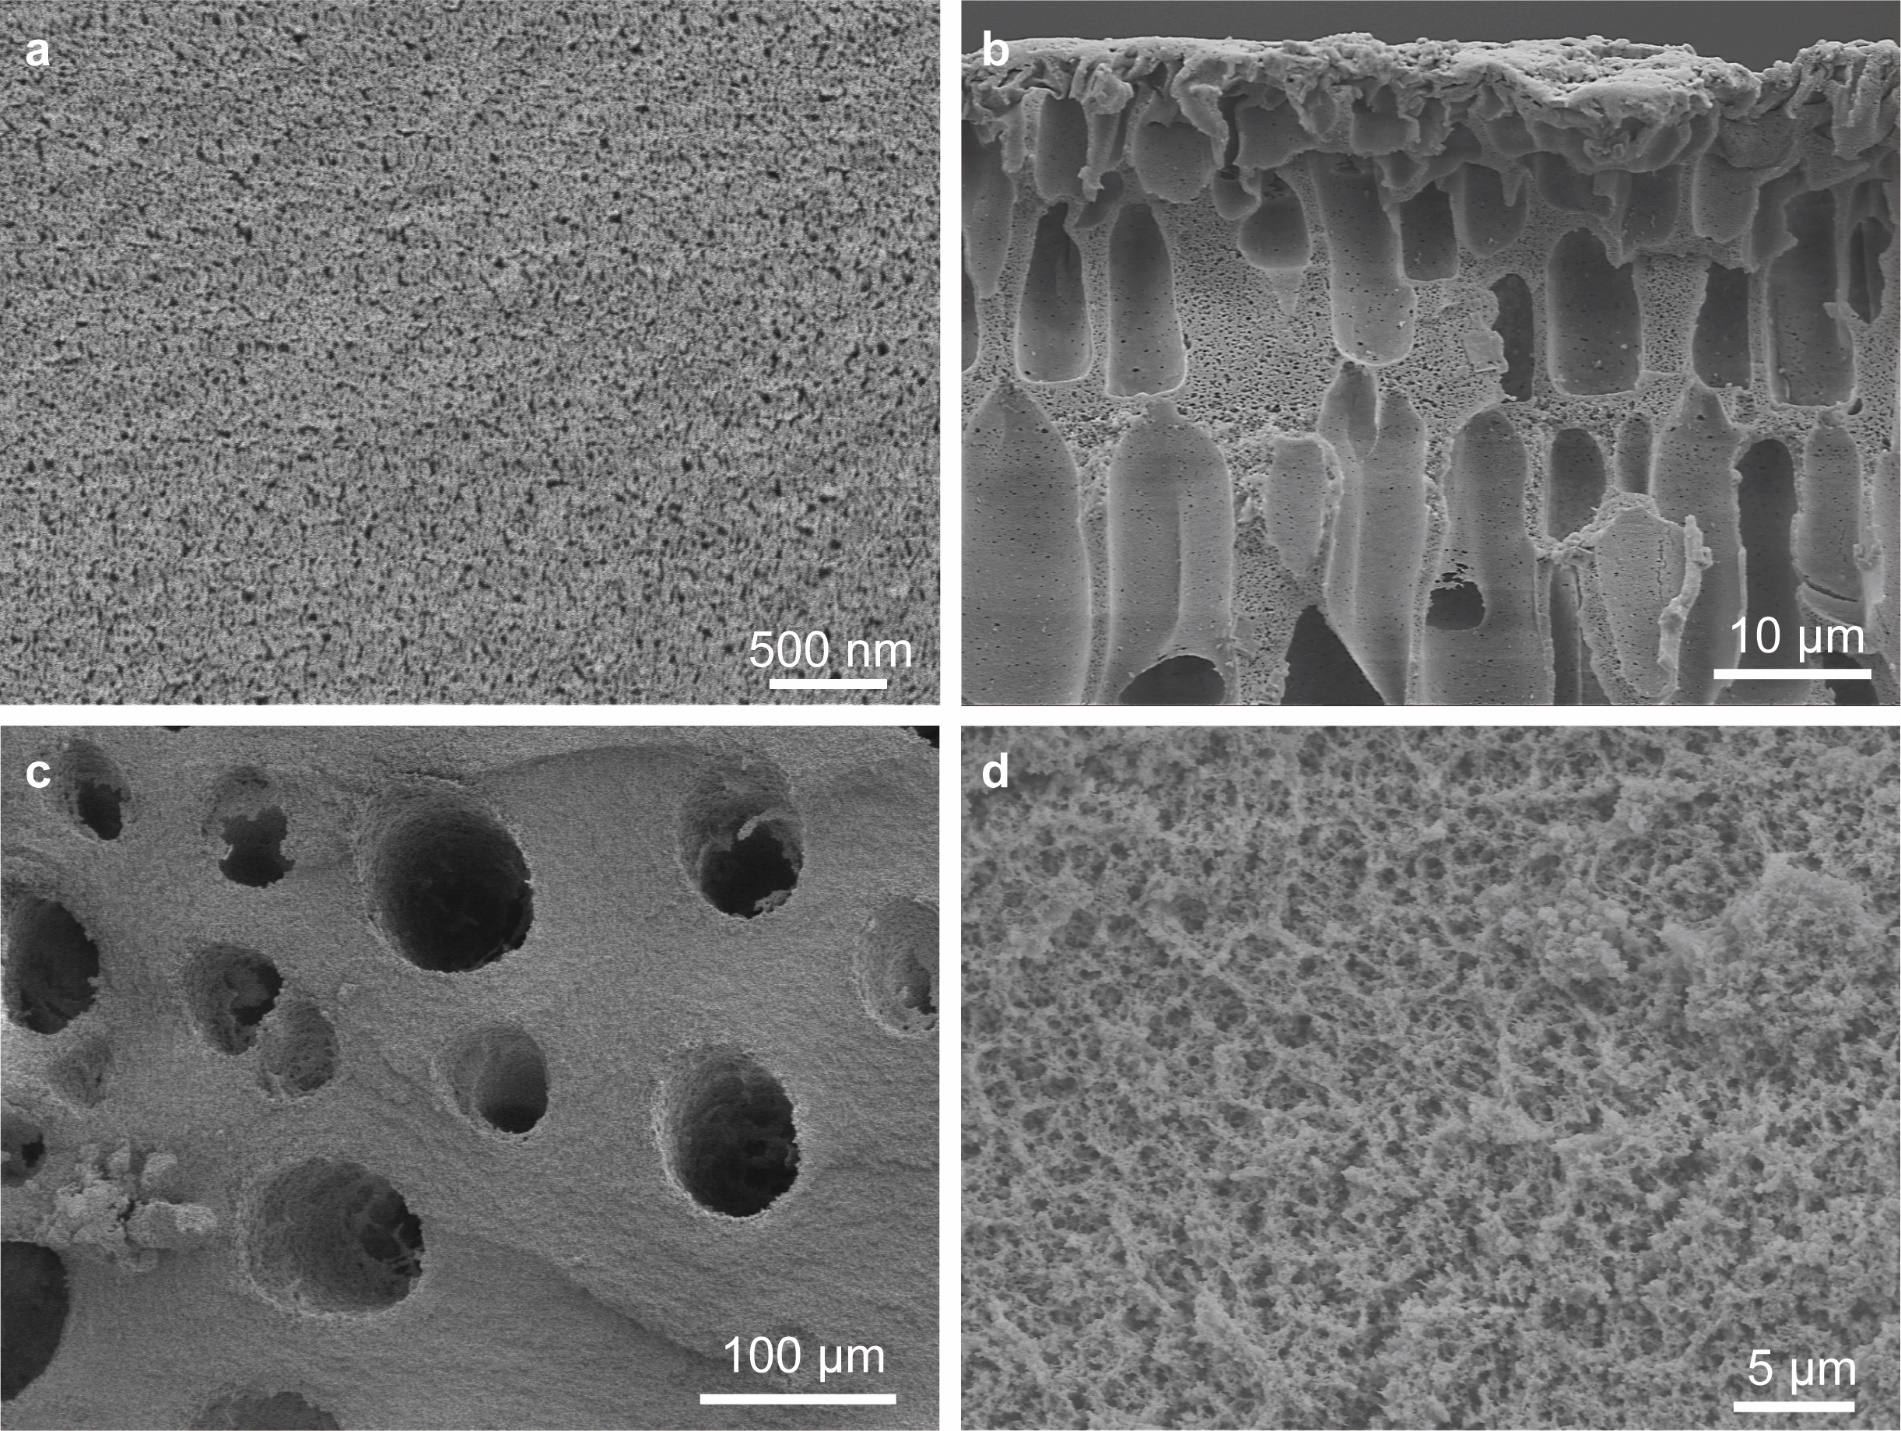


**Supplementary Figure 7 | SEM images of the surface and different cross-sections of the sorbent** (a) Surface of the sorbent (b) Cross-section near the surface of the sorbent (c) Cross-section near the center of the sorbent (d) Pore walls of the sorbent.


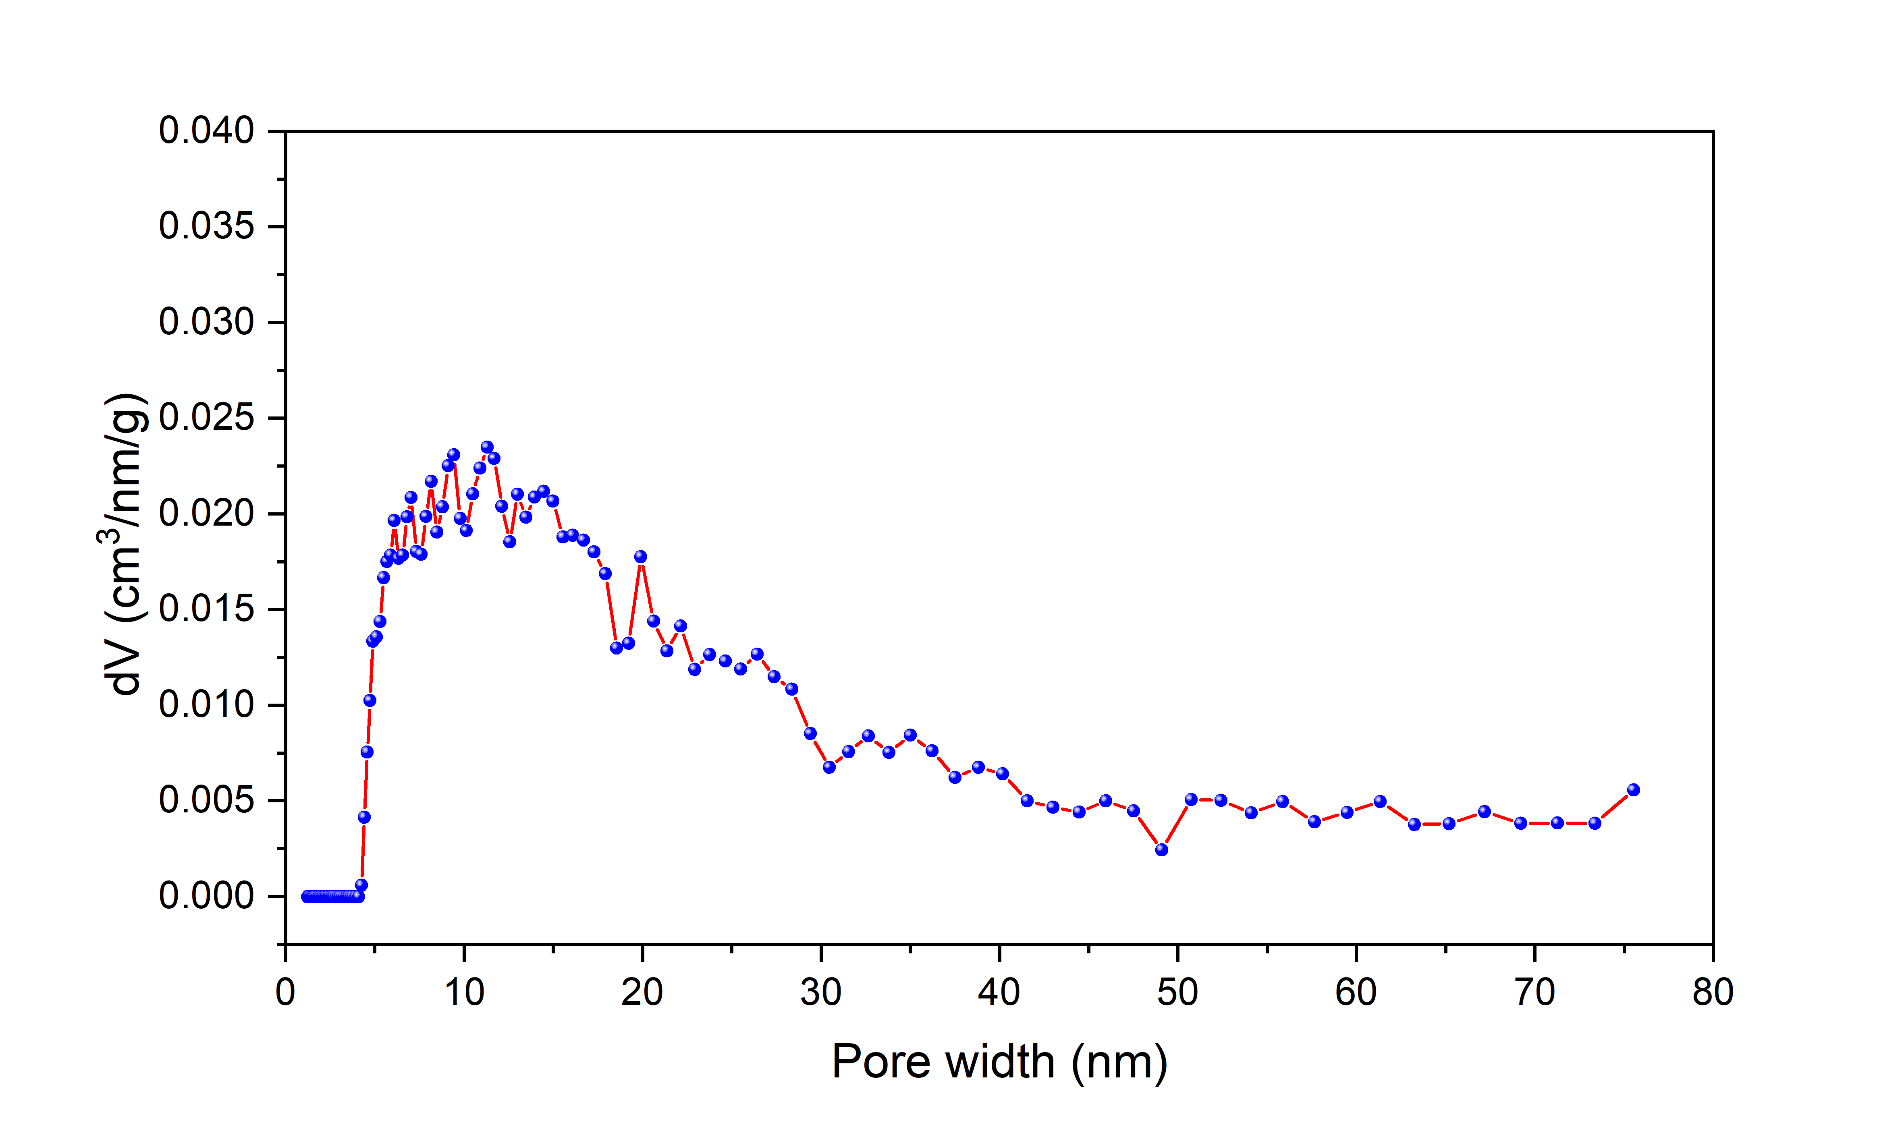


**Supplementary Figure 8 | Pore diameter distribution measured by BET nitrogen adsorption.**


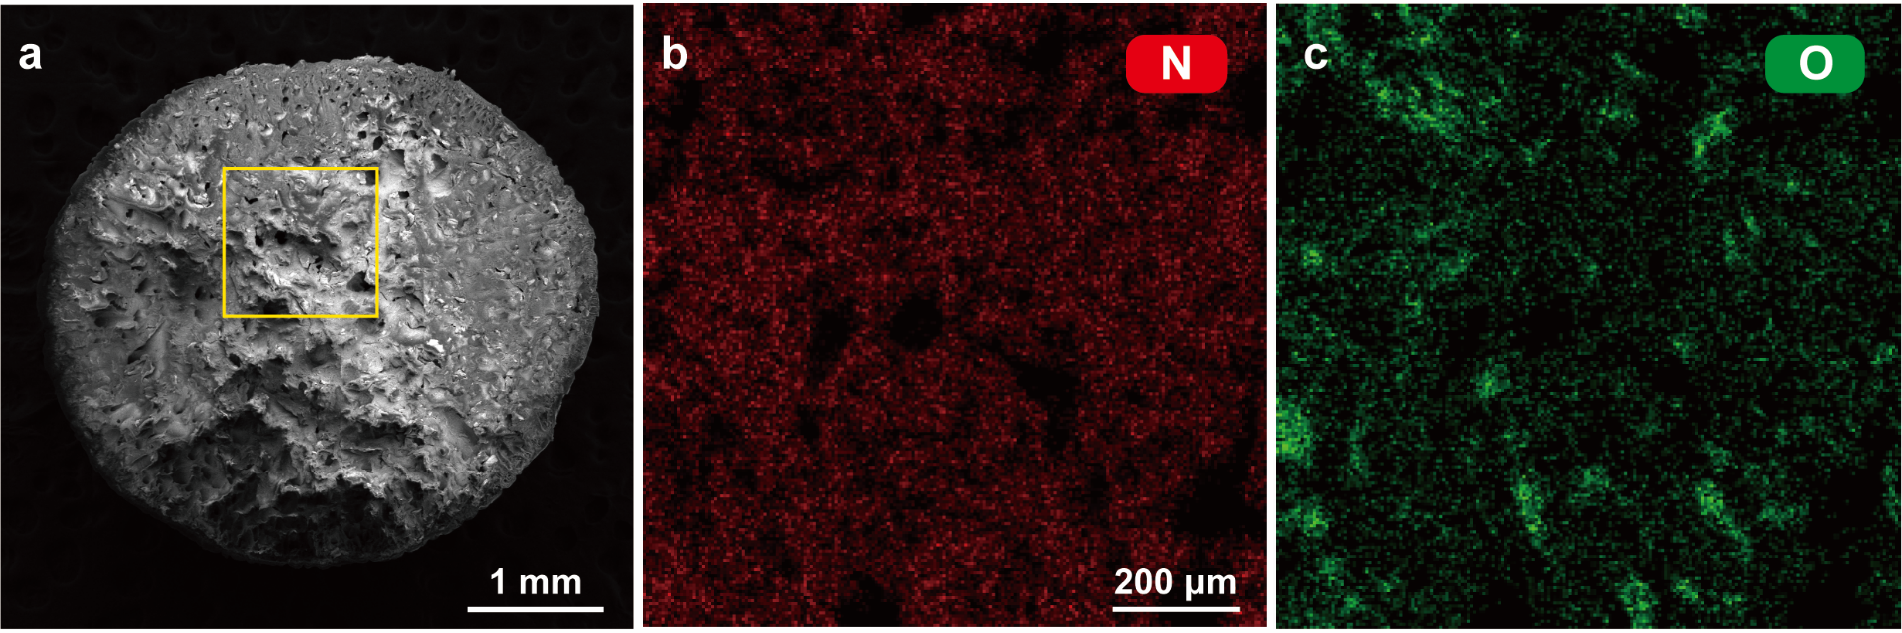


**Supplementary Figure 9 | a**, SEM Mosaic image of section of polyacrylonitrile-chitosan composite adsorption sphere before lithium extraction. EDS mapping of **b,** nitrogen **c,** oxygen


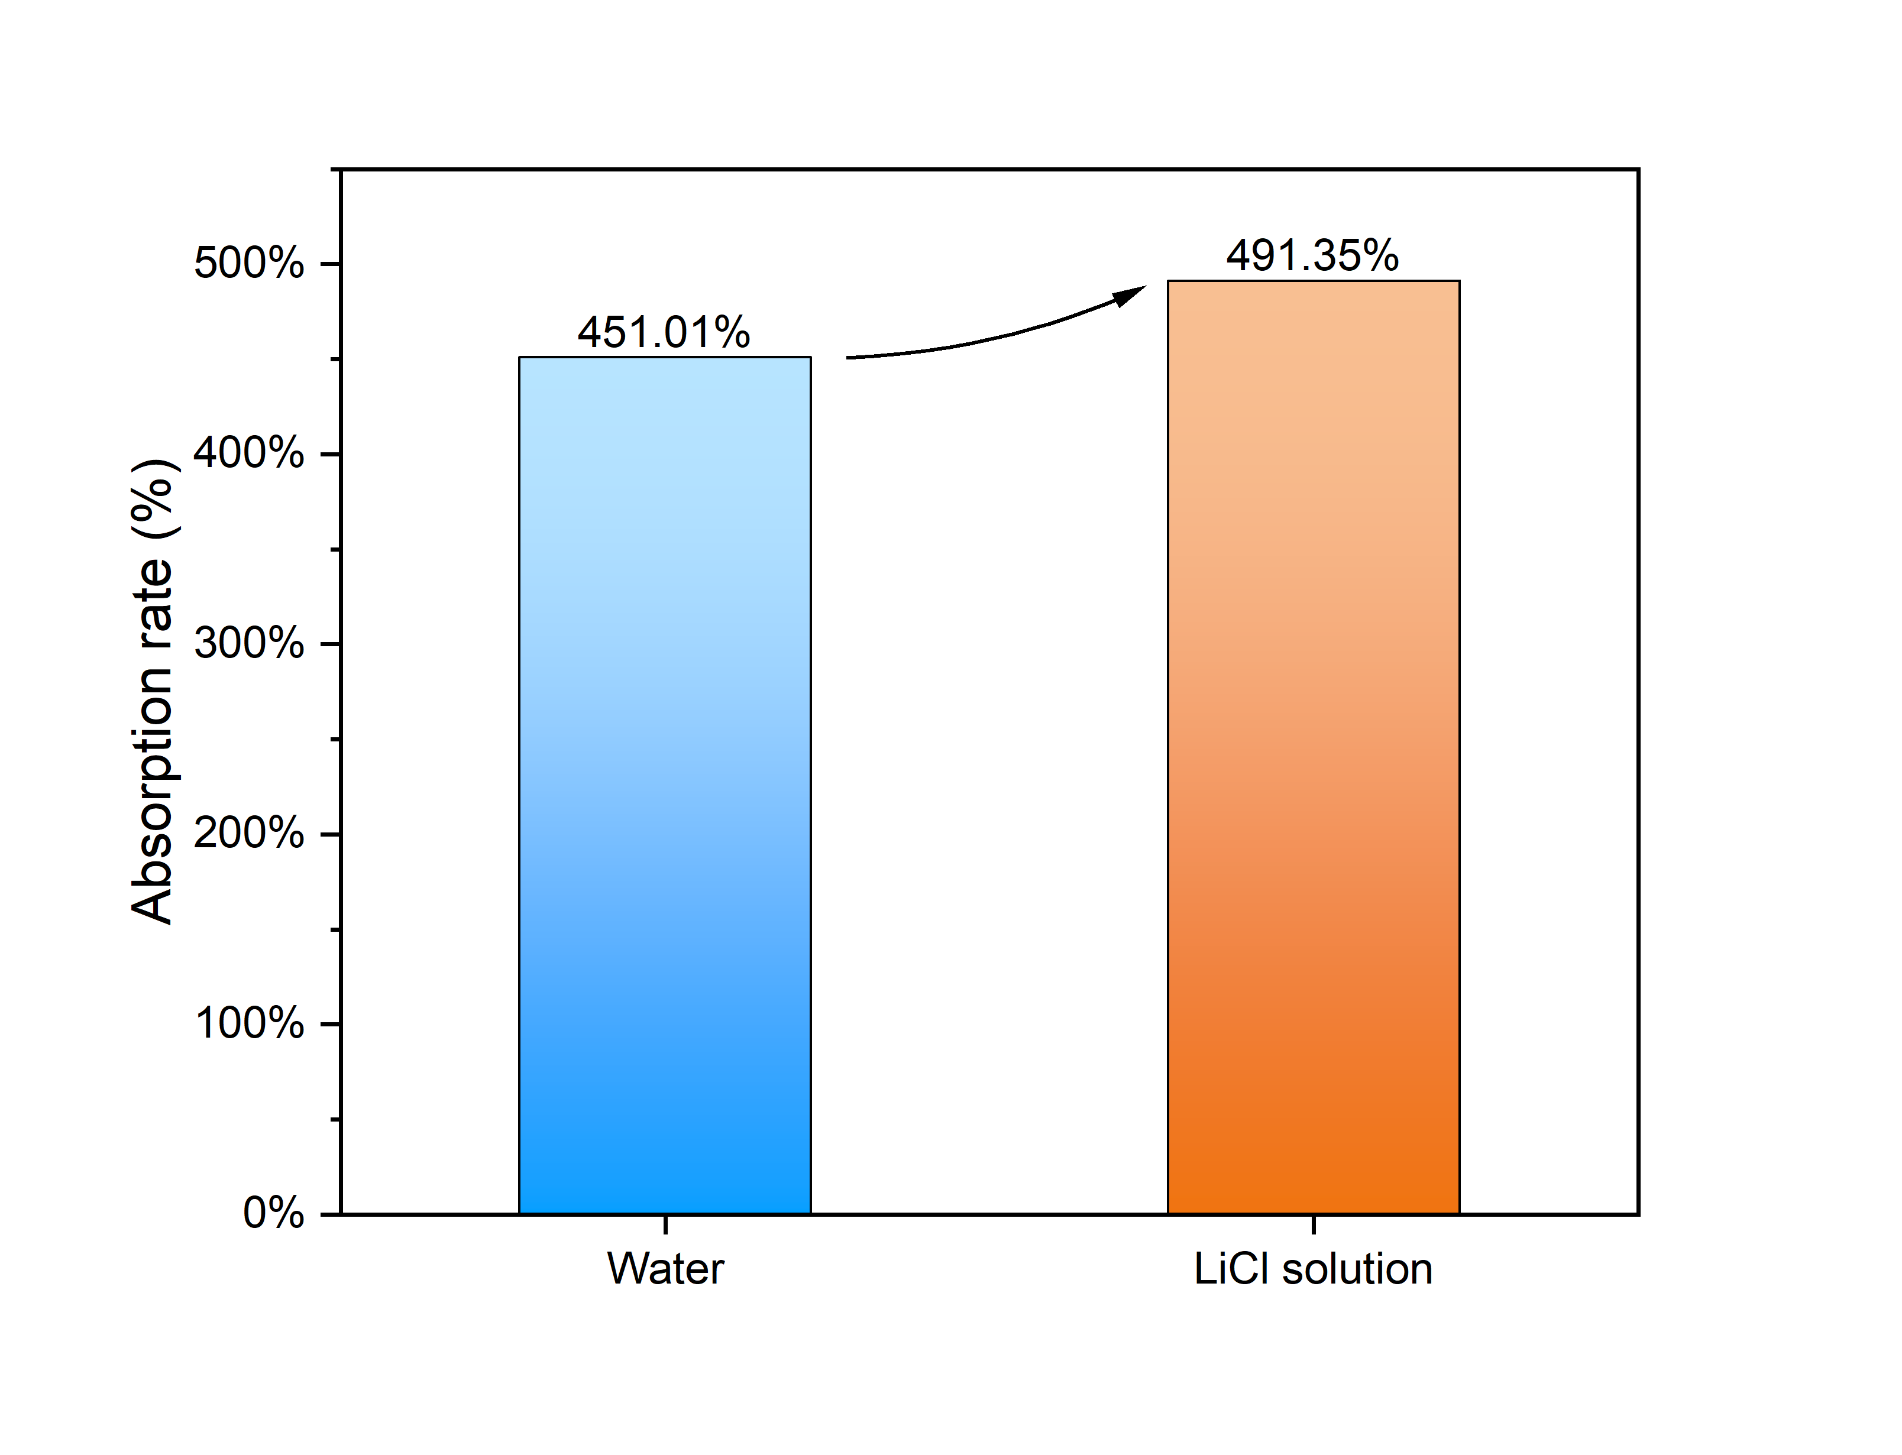


**Supplementary Figure 10 |** Absorption rate of water and lithium chloride solution by polyacrylonitrile-chitosan adsorption spheres


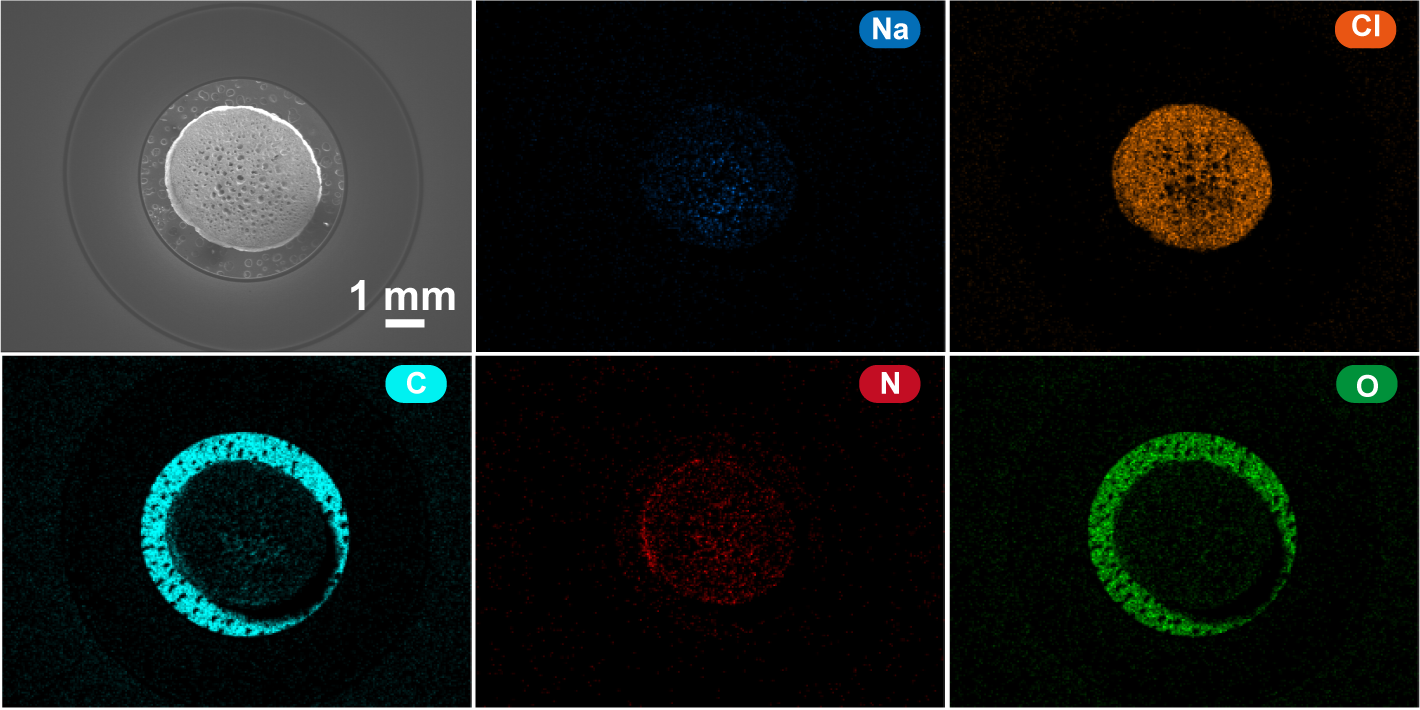


**Supplementary Figure 11 | The large depth of field (LDF) mode of the JSM-7800F captures the SEM and EDS of the complete adsorption sphere.** Due to the large size of the adsorption ball, it is difficult for SEM to photograph the complete morphology of the ball. Although LDF mode can see the complete morphology, its resolution is relatively low.


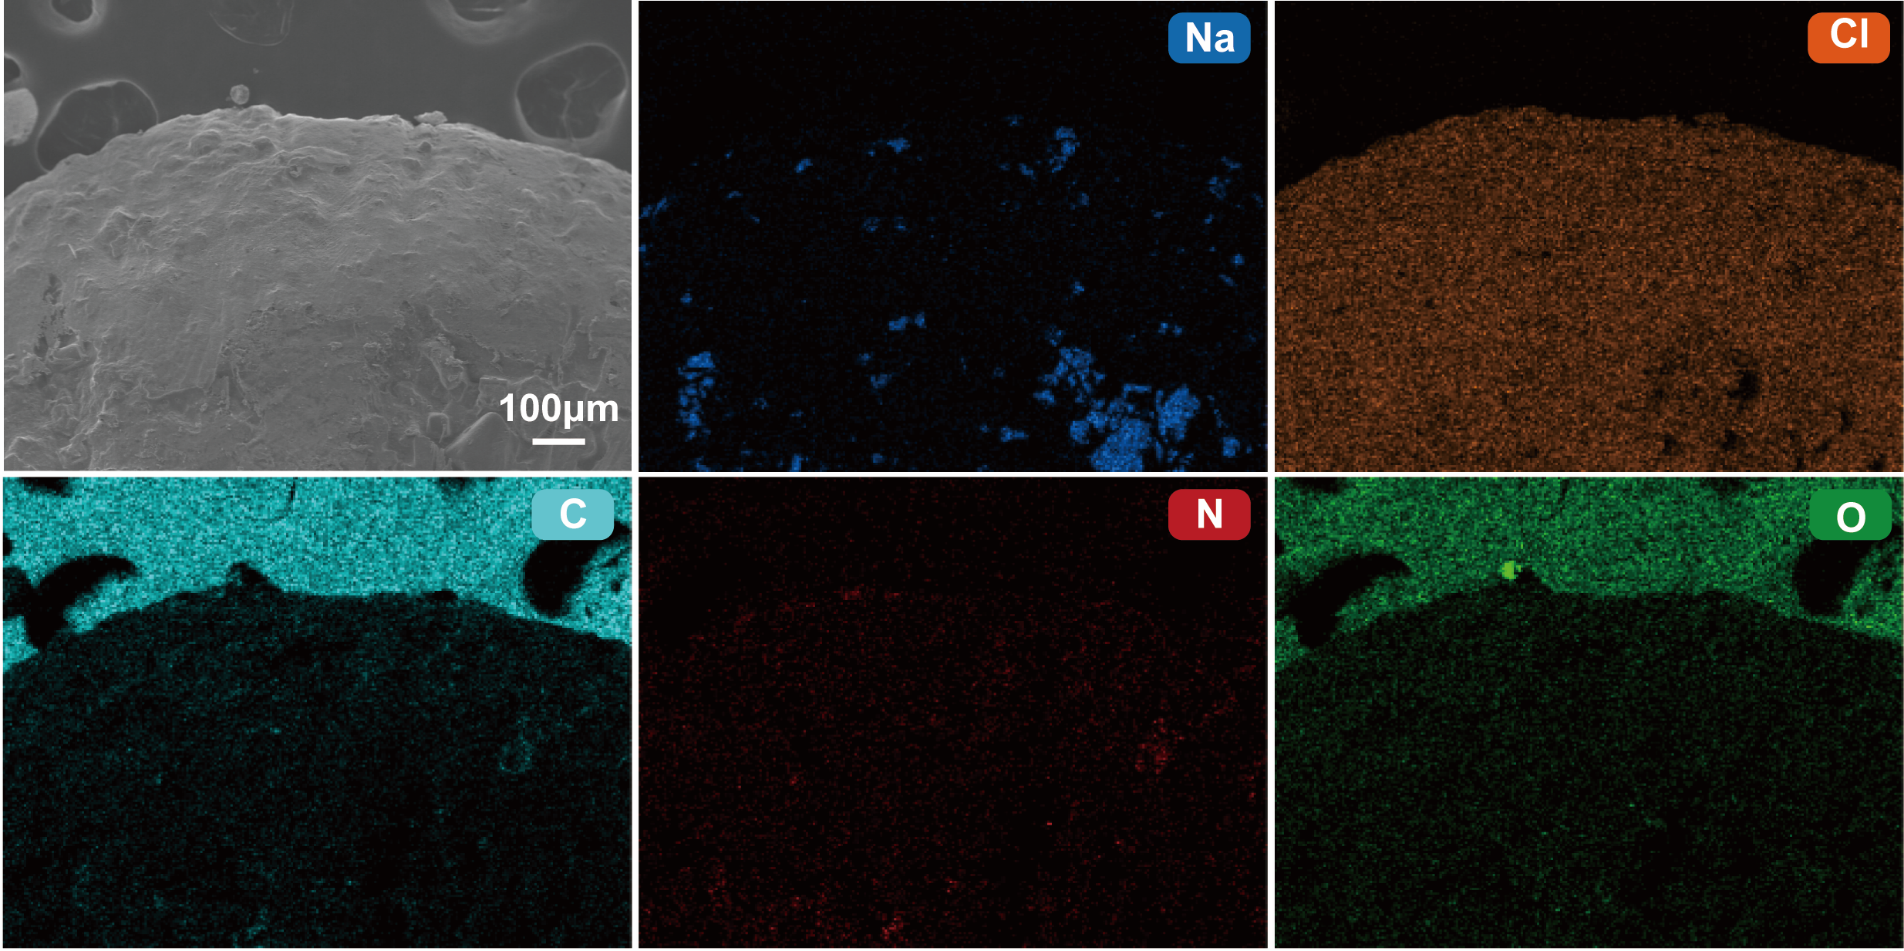


**Supplementary Figure 12 | EDS mapping of surface of adsorption sphere after lithium extraction.** Chlorine is uniformly distributed on the surface and covers the signals of C, N and O, and a small amount of Na is scattered on the surface


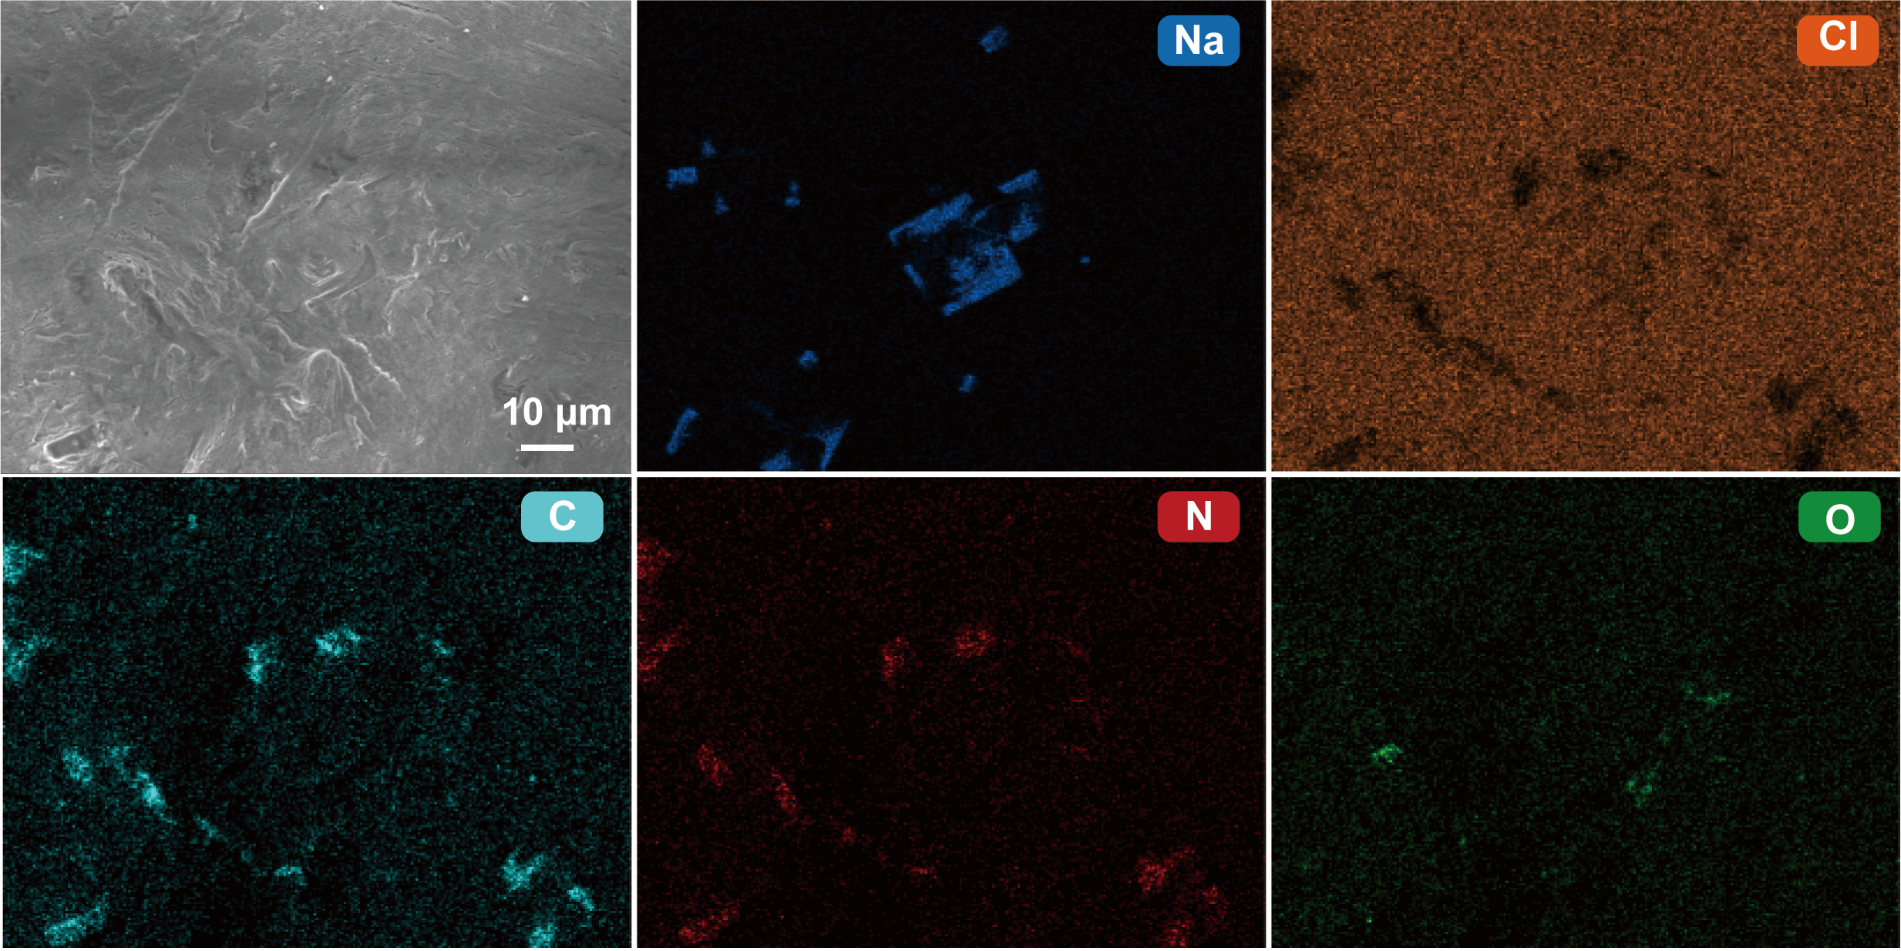


**Supplementary Figure 13 | EDS mapping of the middle of the surface of adsorption sphere after lithium extraction.**


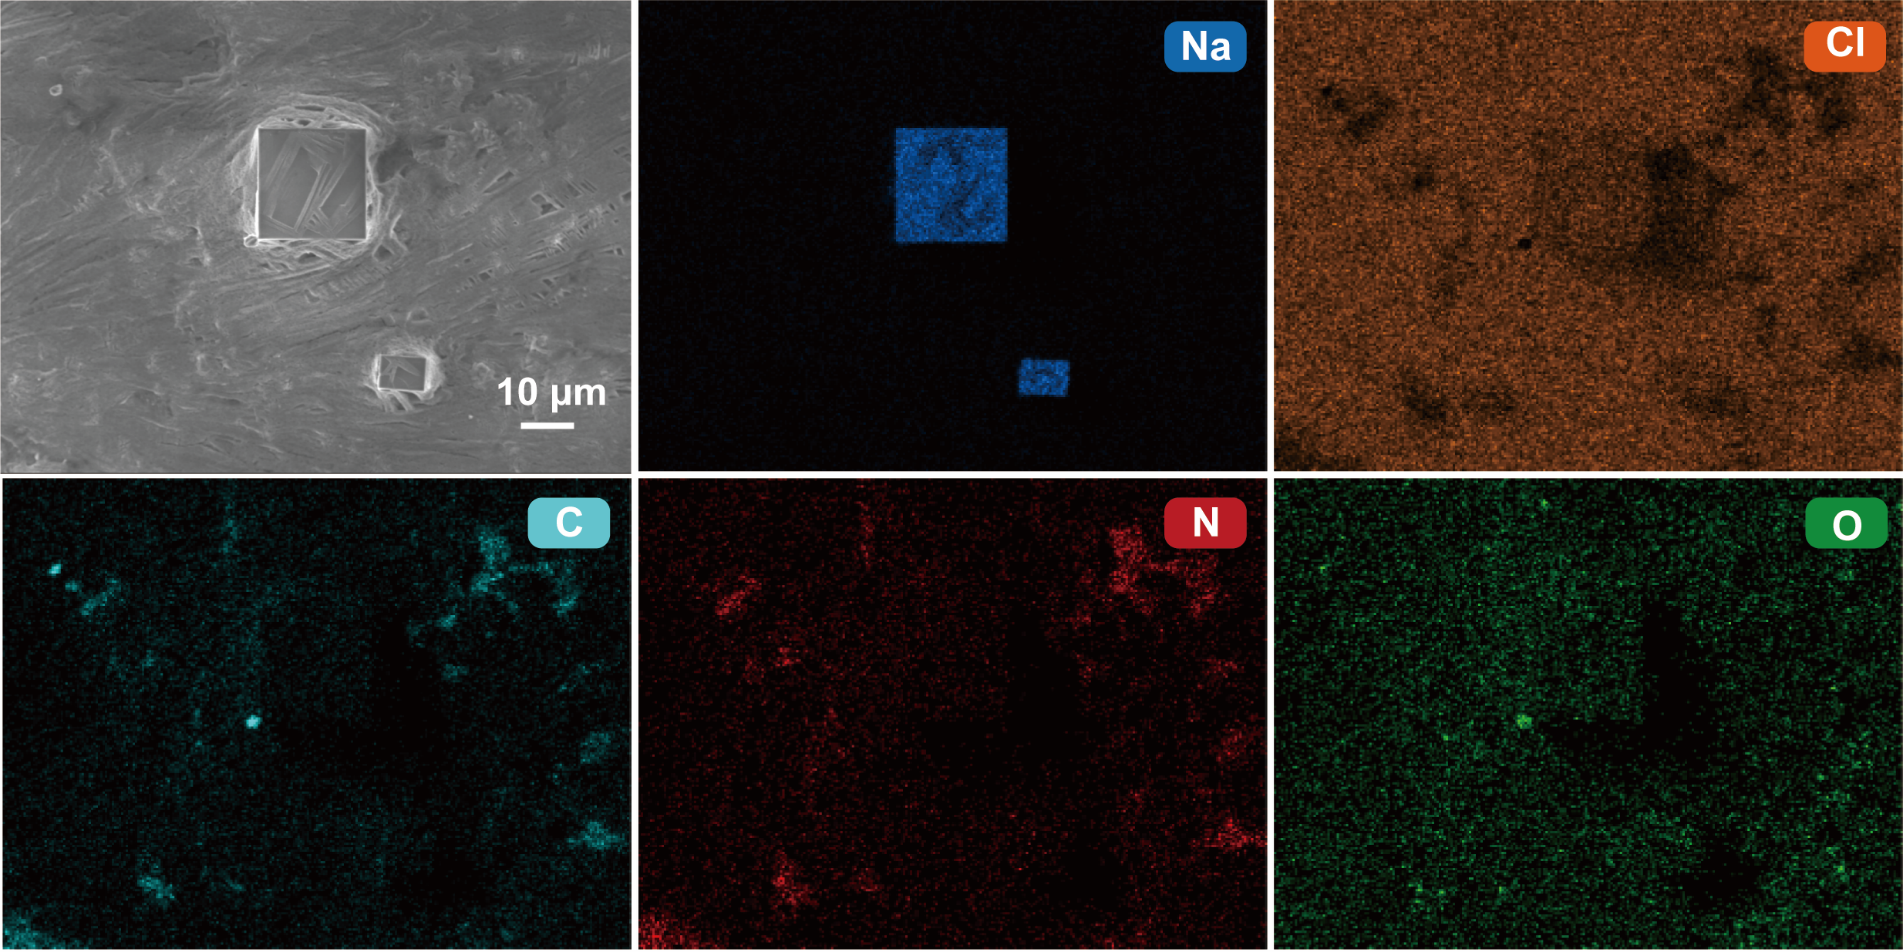


**Supplementary Figure 14 | Enlarged EDS view of the middle area of the surface of adsorption sphere after lithium extraction.** NaCl crystallizes in a cube form and does not form a solid solution with lithium chloride

**Supplementary Figure 15 | Positive mode mass spectra of TOF-SIMS**

**Supplementary Figure 16 | Negative mode mass spectra of TOF-SIMS**


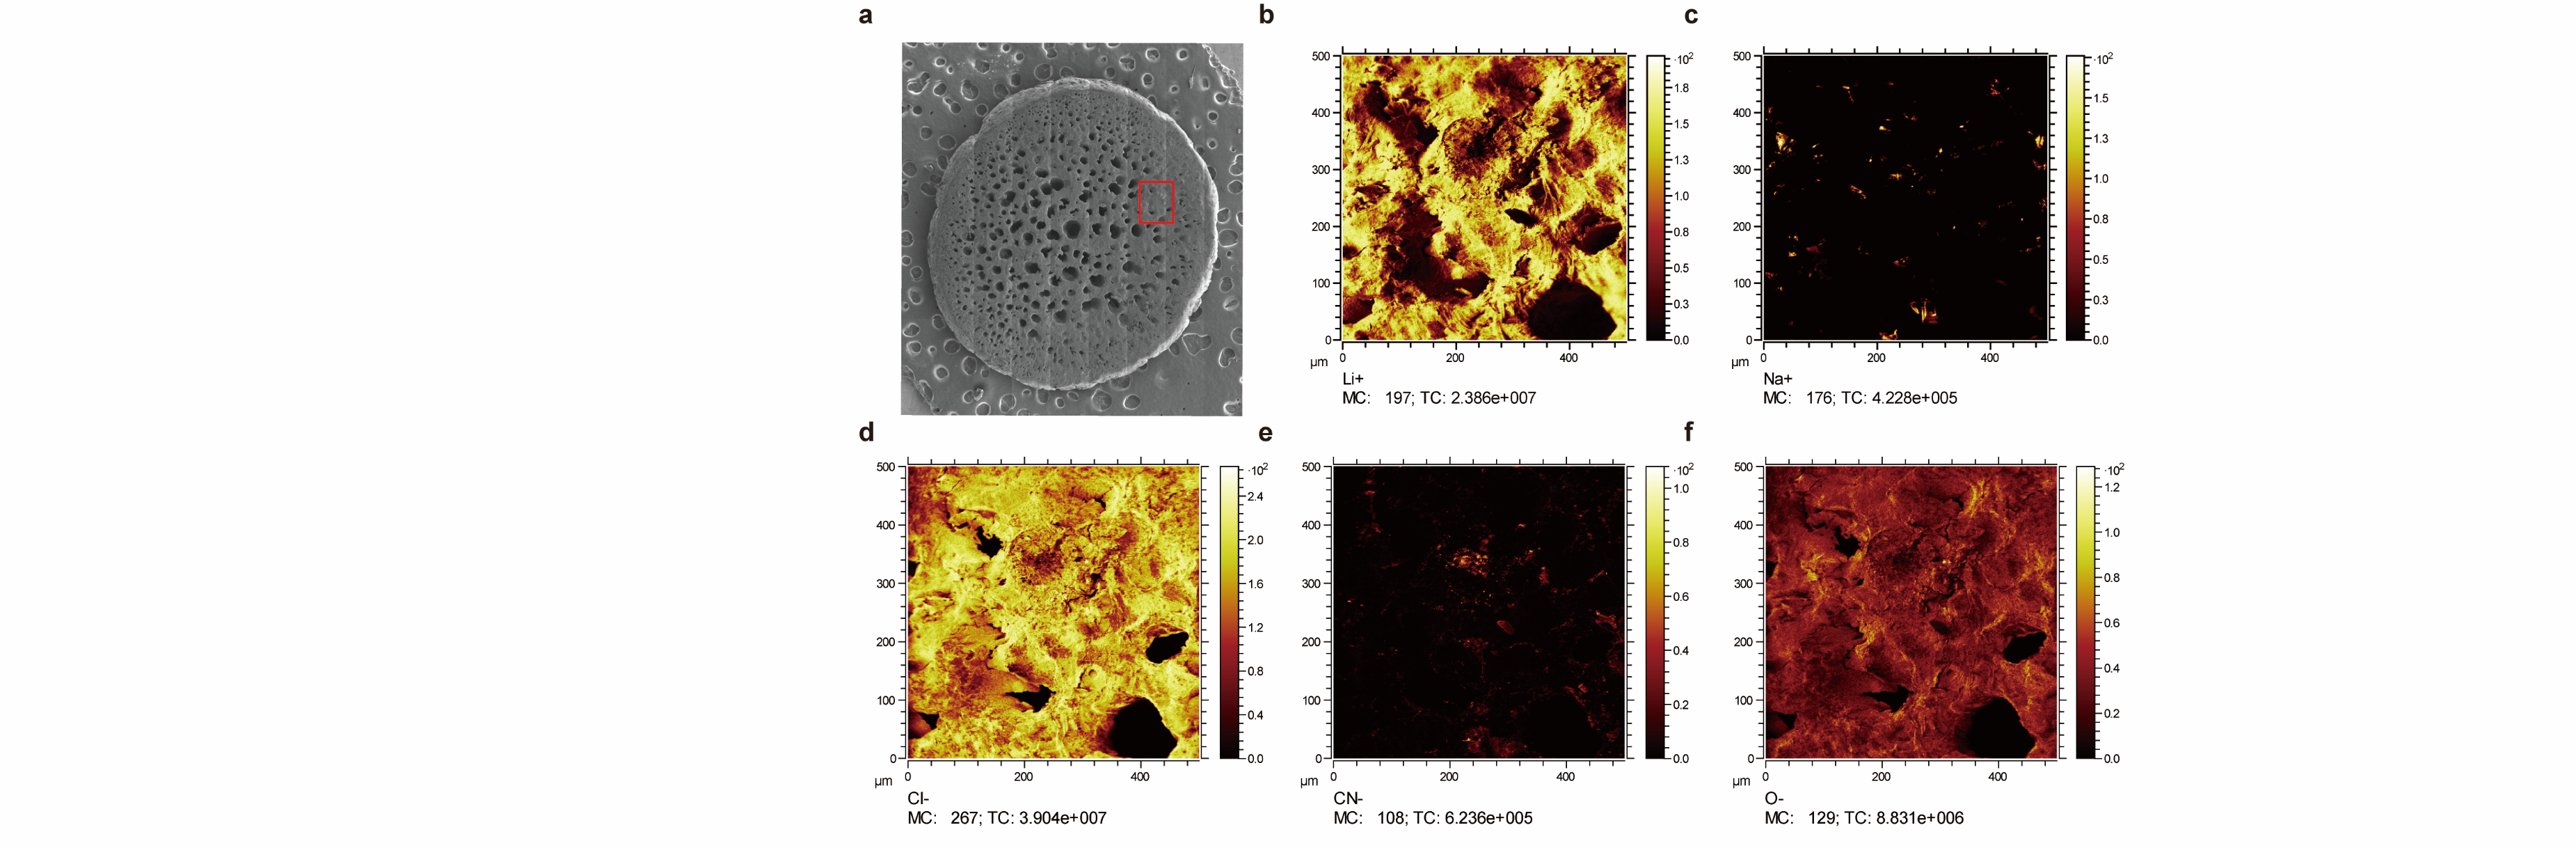


**Supplementary Figure 17 | TOF-SIMS two-dimensional imaging at the cross section position of the adsorption sphere near the surface.**


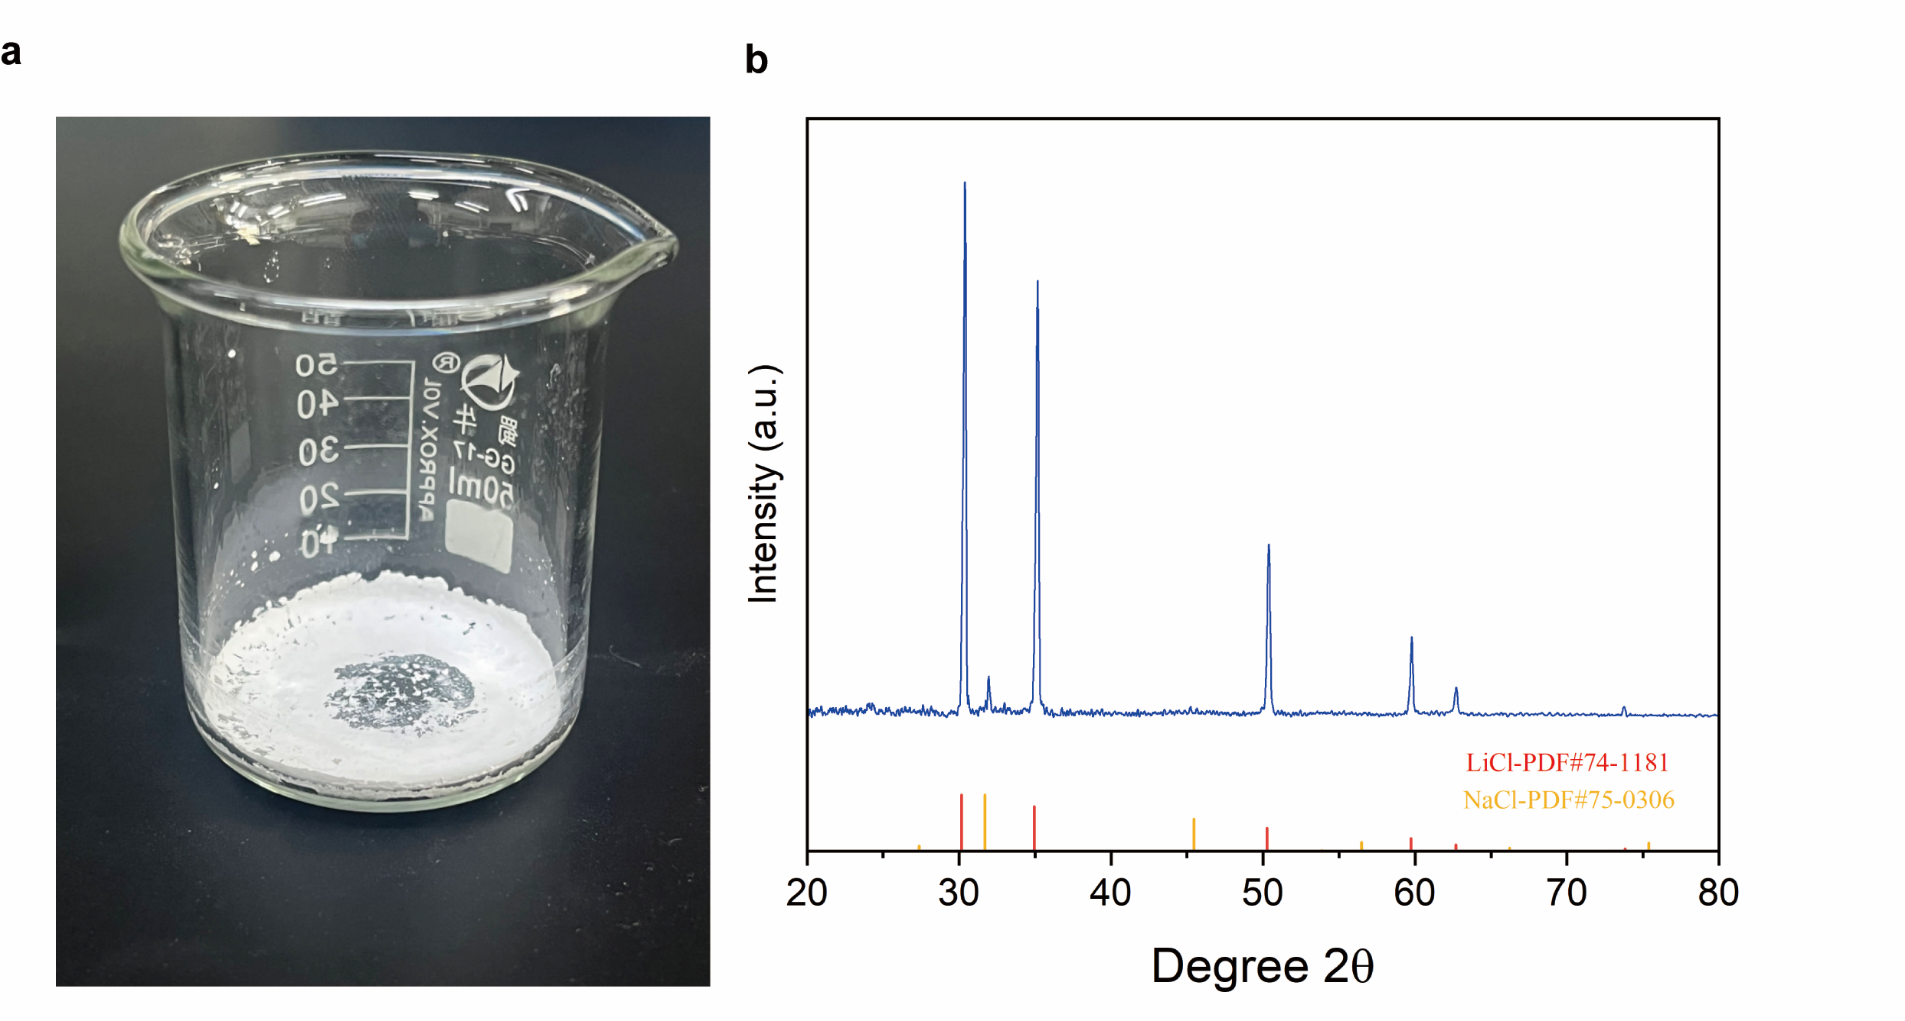


**Supplementary Figure 18 | a**,XRD of recovered powder after lithium extraction. **b**,Recovered LiCl powder


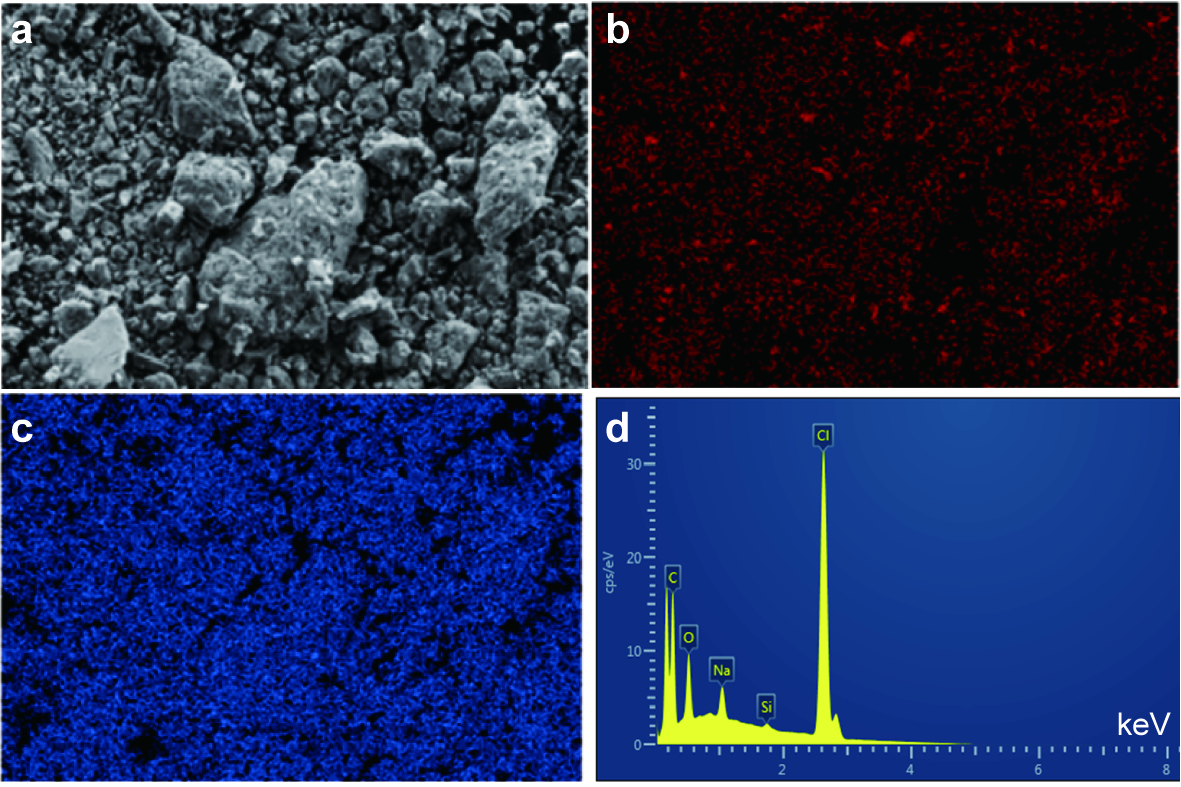


**Supplementary Figure 19 |** SEM and EDS images of recovered powder after lithium extraction **a**, SEM image **b**, EDS distribution of Sodium **c**, EDS distribution of Chloride **d**, EDS spectrum.


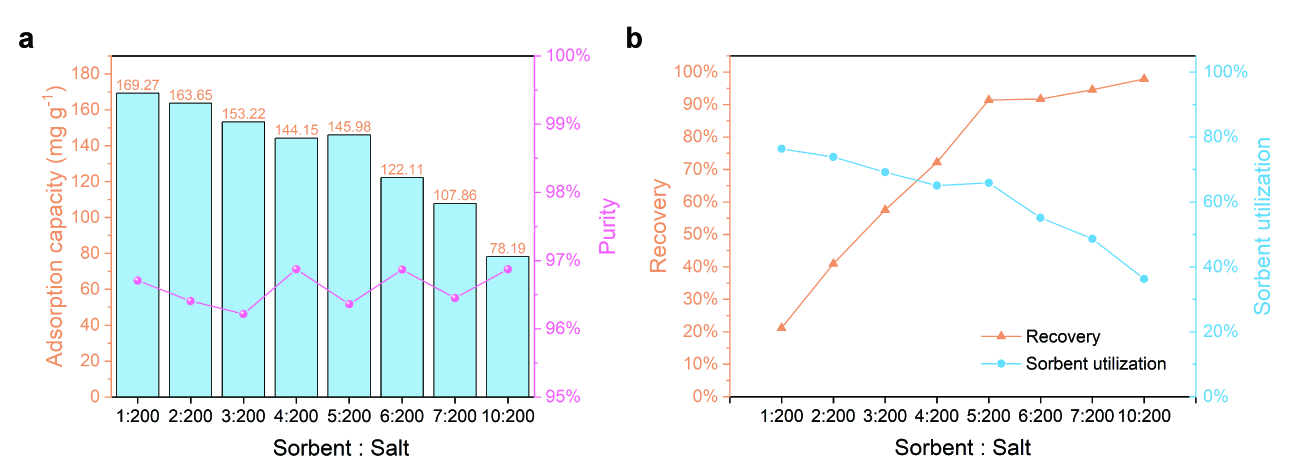


**Supplementary Figure 20 | a**,Effect of the ratio of mixed salt to adsorption ball on adsorption capacity and purity **b**,Recovery rate, sorbent utilization


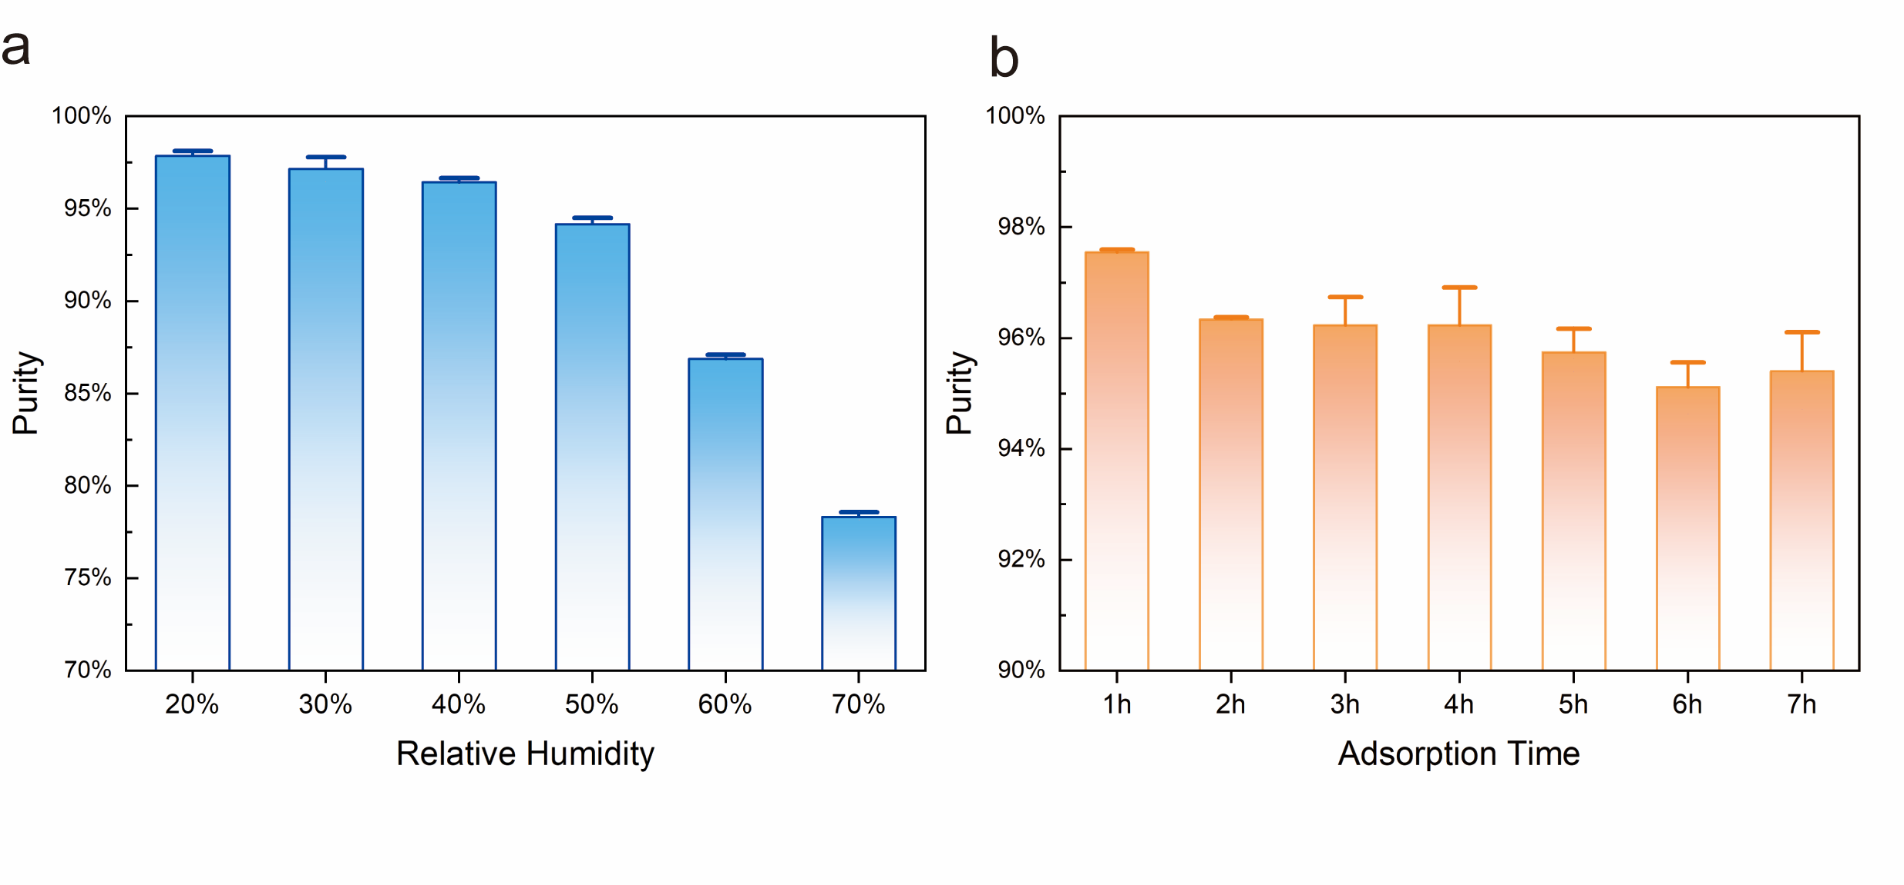


**Supplementary Figure 21 | a**, Purity at different humidities **b**, Purity at different adsorption time.


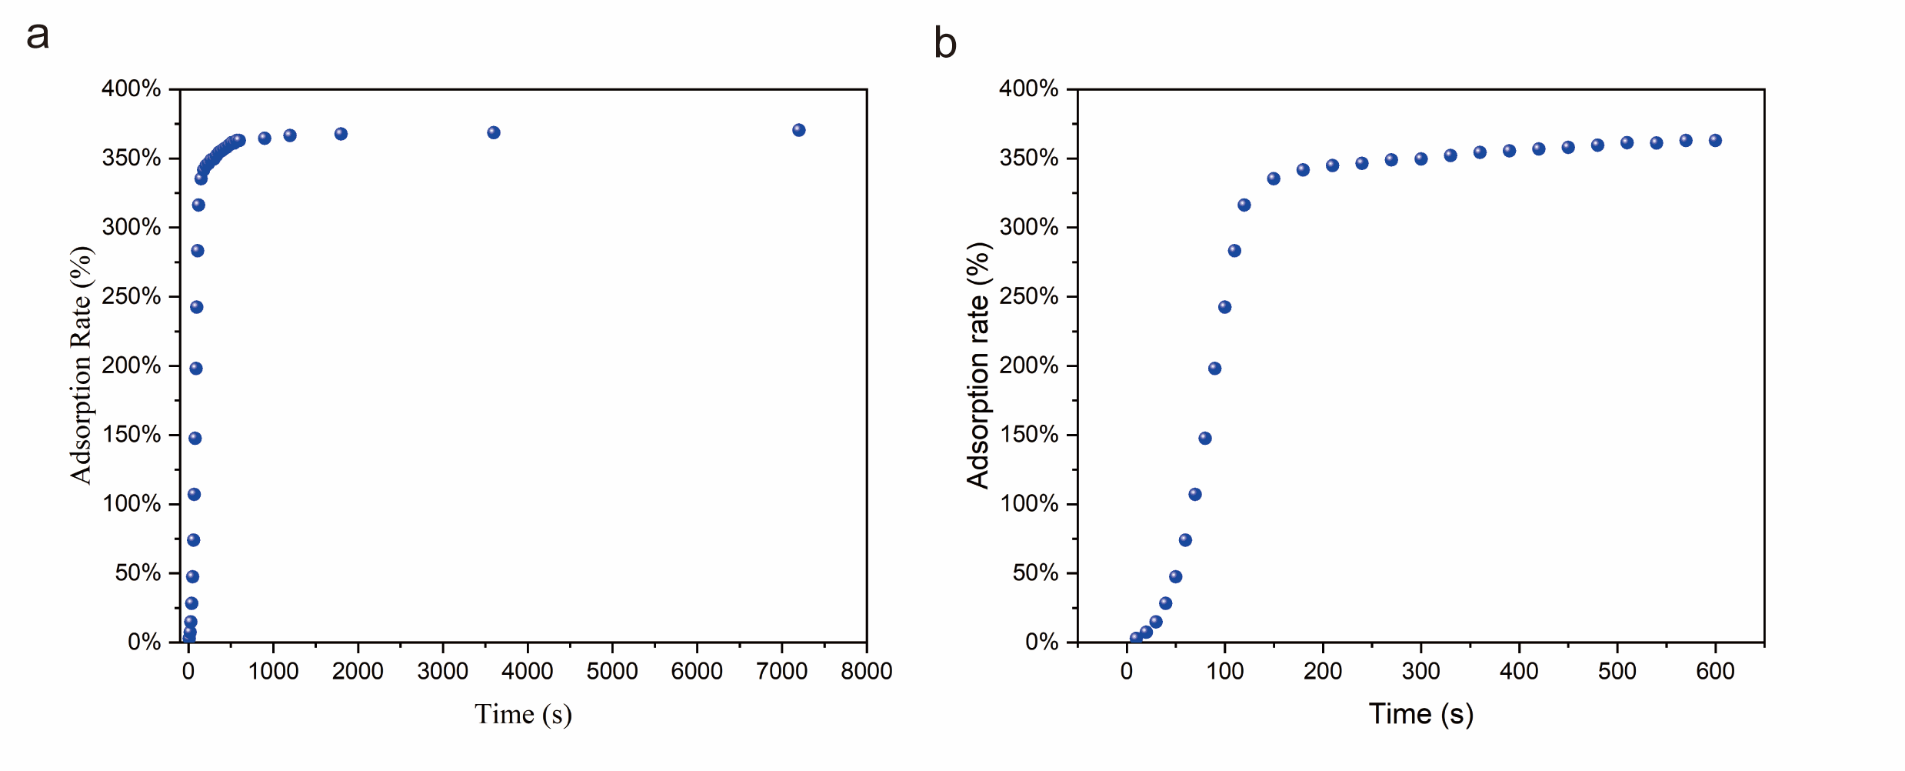


**Supplementary Figure 22 |** The change of adsorption capacity of adsorption ball with time in 8.5 M LiCl solution **a**, adsorption for 7200s **b**, figure S22 zoomed in at 0-600s.


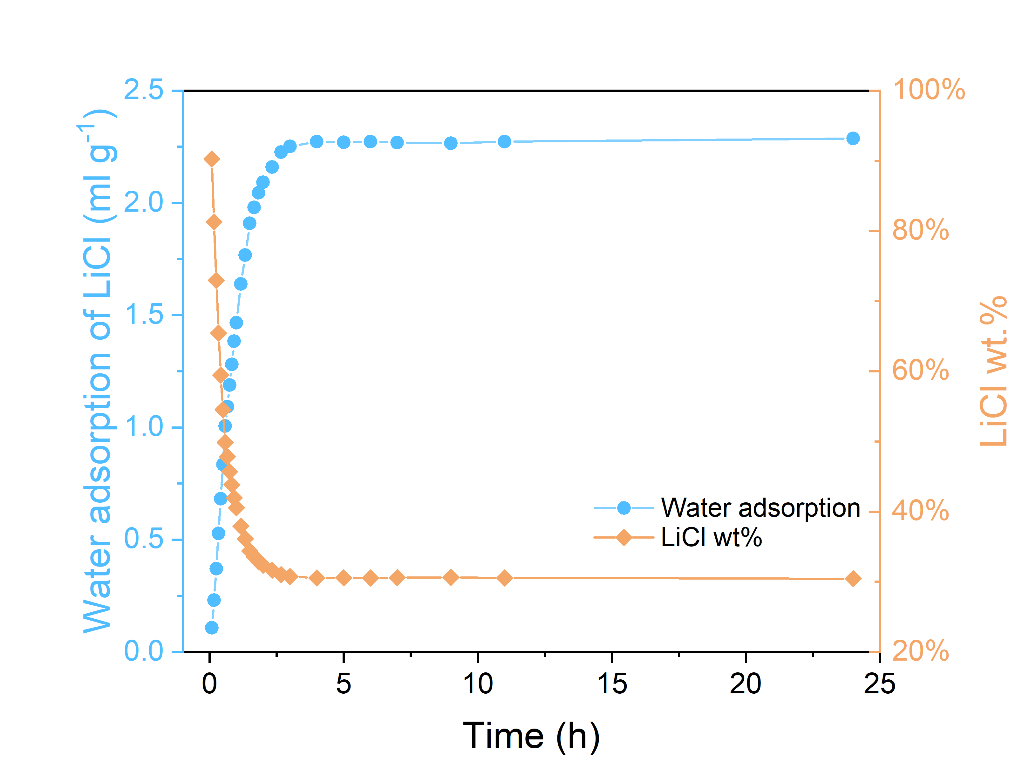


**Supplementary Figure 23 |** In a LiCl-NaCl mixed salt with a lithium ion content of 3.33% under 40% RH, the water absorption rate of LiCl and the mass fraction of the resulting LiCl solution.


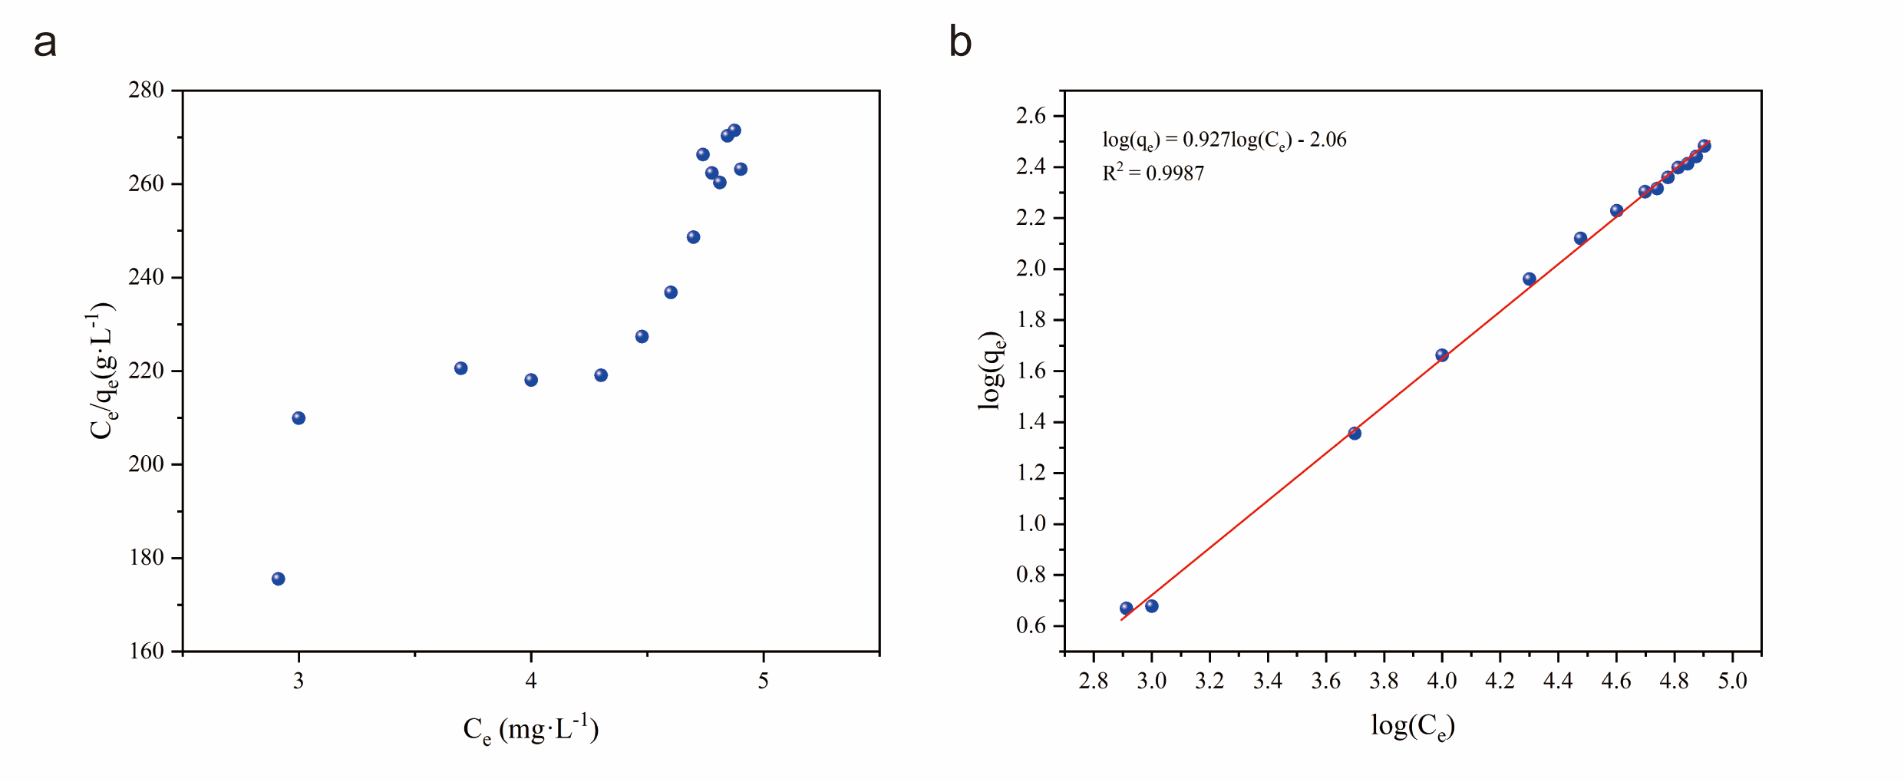

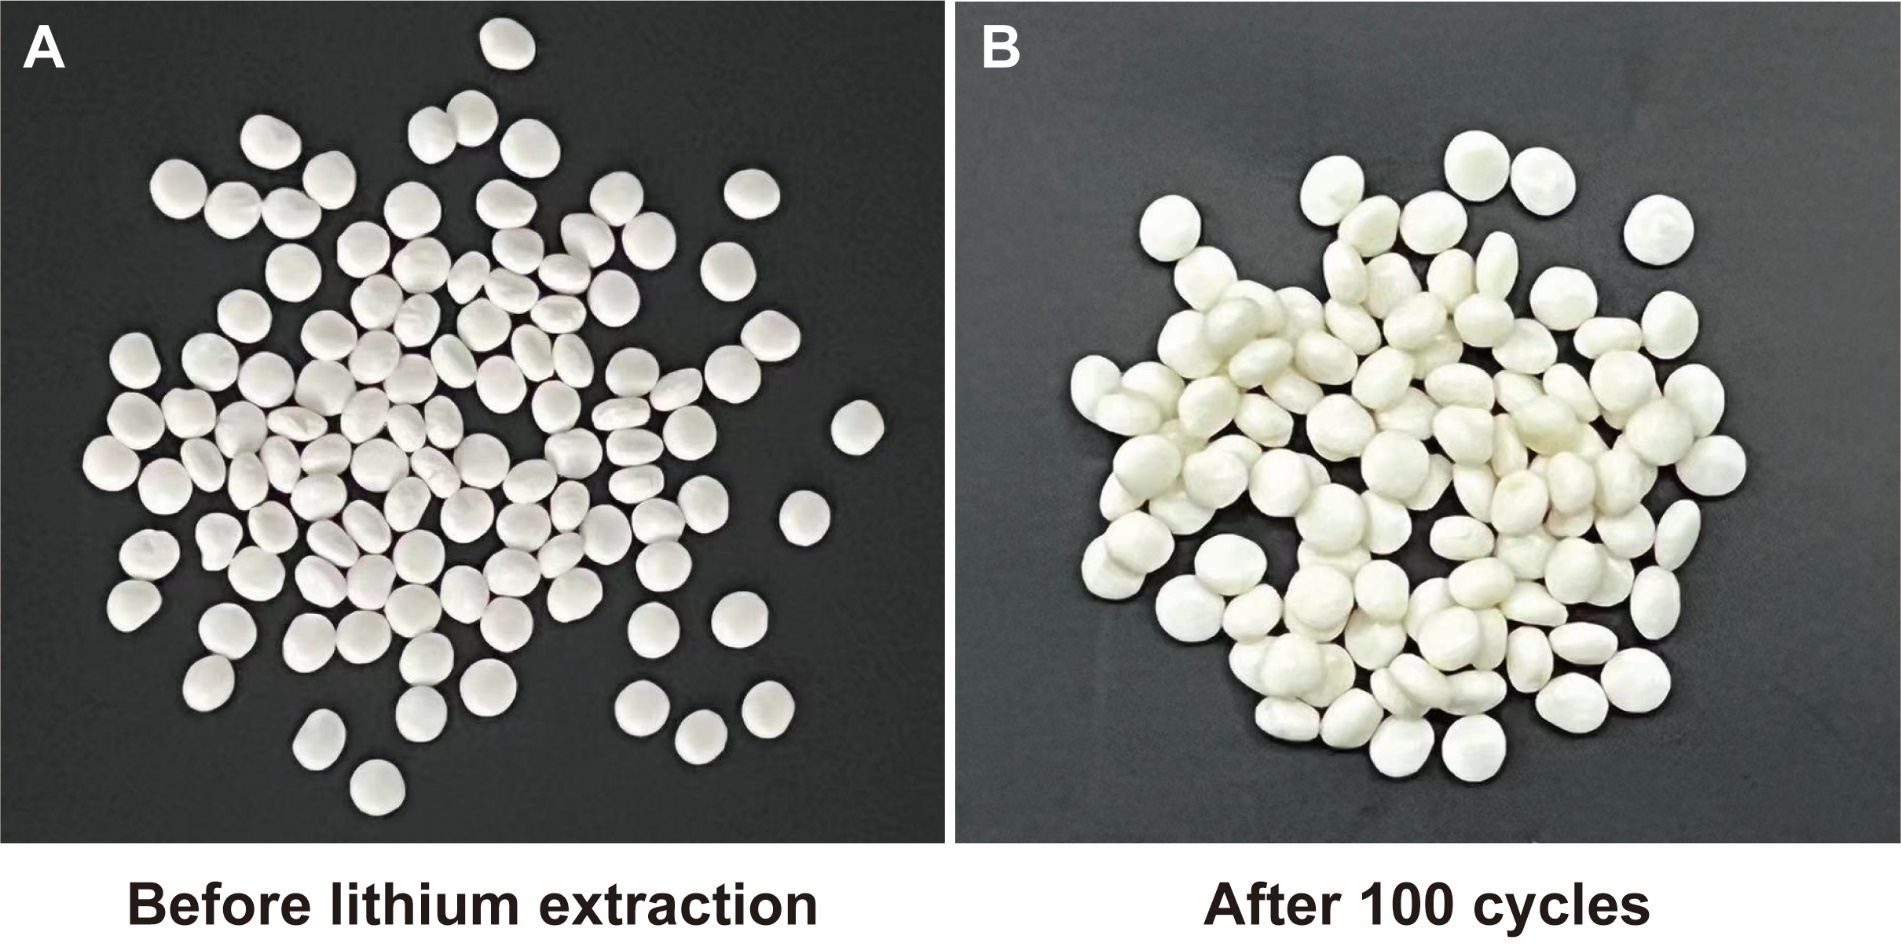


**Supplementary Figure 24 |** Isothermal adsorption of adsorption spheres in 8.5 M LiCl solution

**
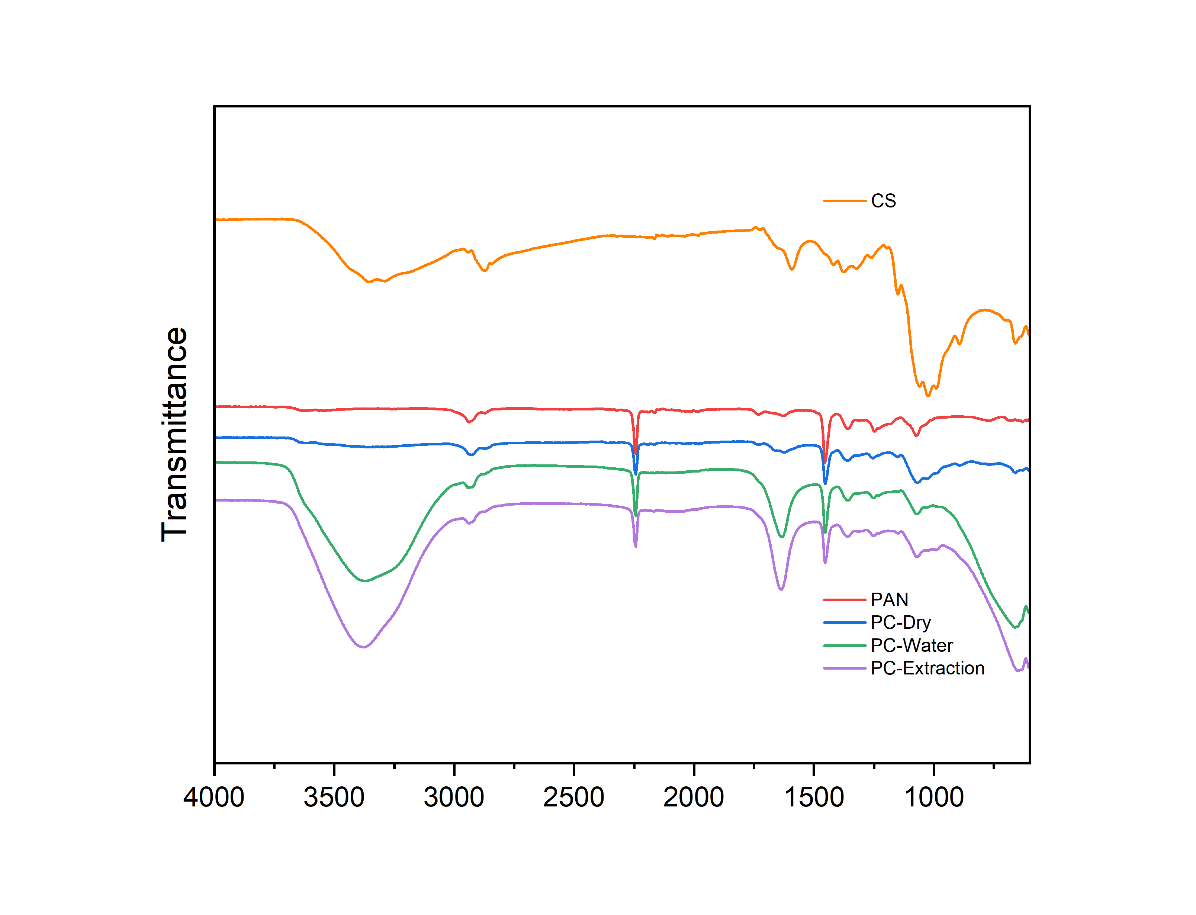
**

**Supplementary Figure 25 | IR of precursor，adsorbed spheres before and after lithium extraction.** There was no significant displacement of the peak before and after preparation of the sorbents, before and after absorption of the composite adsorption ball and after extraction of lithium


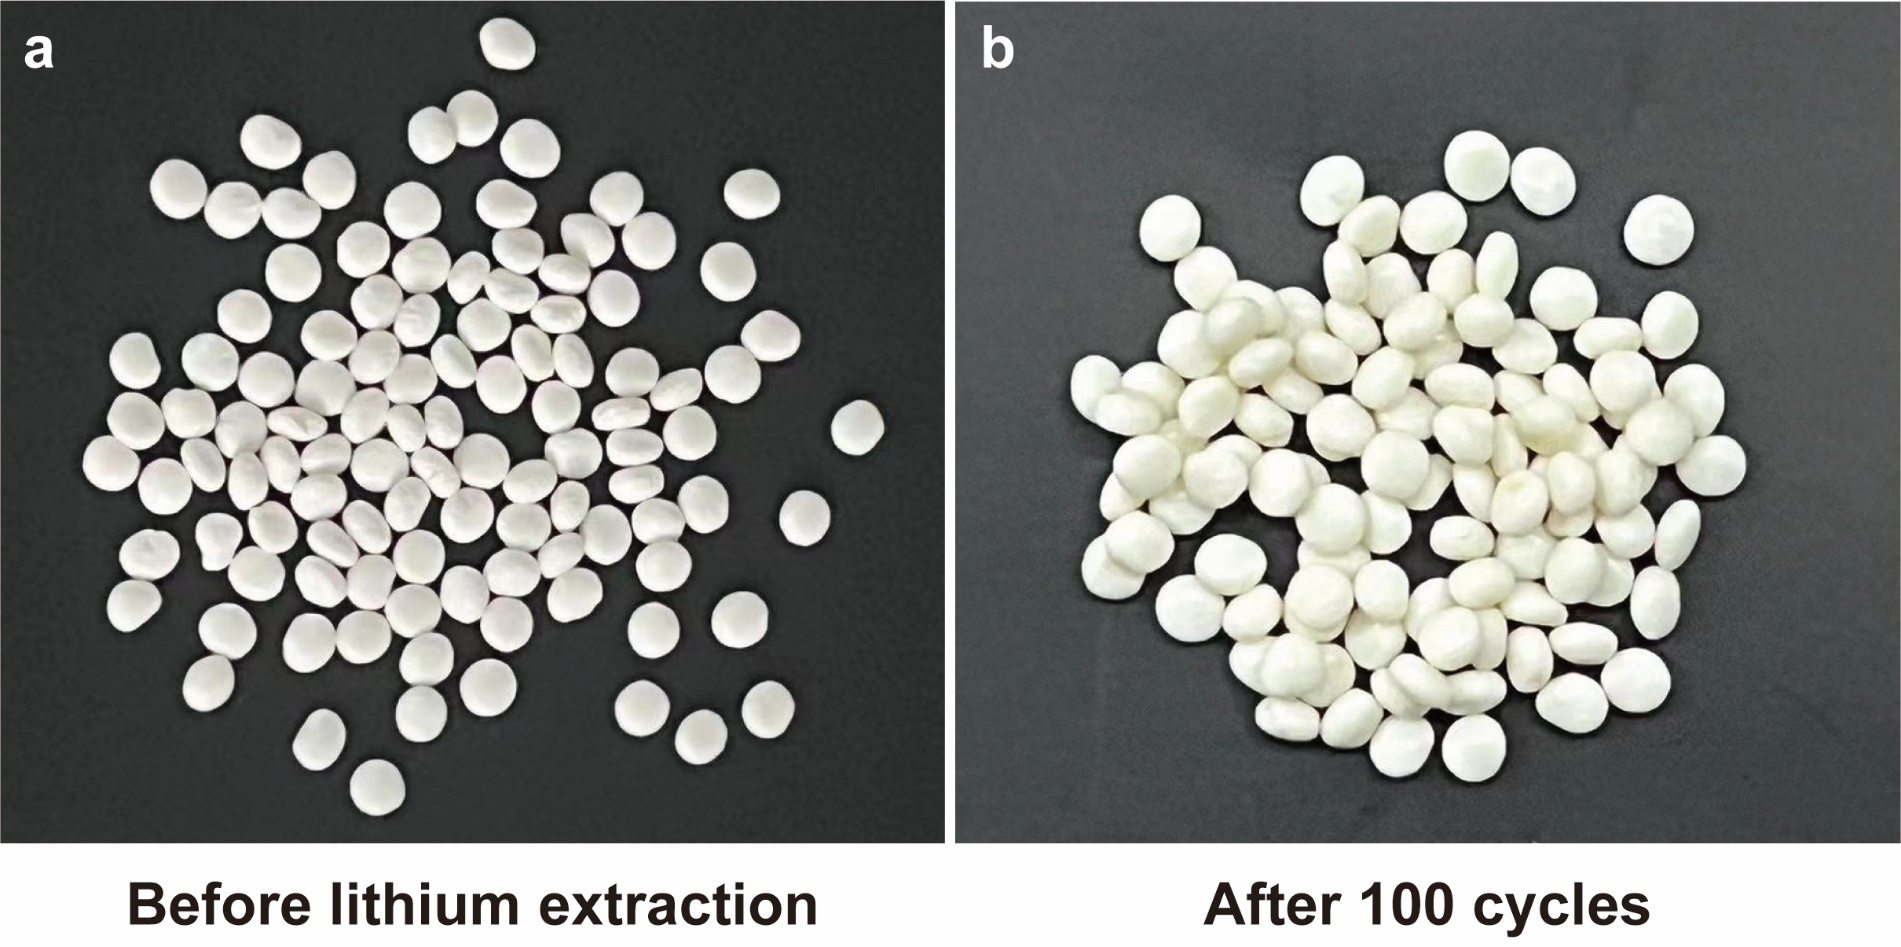


**Supplementary Figure 26 |** The changes of adsorption spheres before and after 100 cycles **a**,before lithium extraction **b,** after 100 cycles lithium extraction

**Supplementary Table 1 | Aluminum-based adsorbent**

| Equilibrium time (h) | Adsorption capacity (mg g-1) | Adsorption rate (mg g-1 h-1) | Recycle | References |
| --- | --- | --- | --- | --- |
| 2 | 7.3 | 3.64 | 12 | 3 |
| 4 | 6.3 | 1.58 | 8 | 4 |
| 4 | 3.0 | 0.75 | Not mentioned | 5 |
| 2 | 9.33 | 4.67 | Not mentioned | 6 |
| 36 | 5.69 | 0.16 | Not mentioned | 7 |
| Average | 6.3 | 2.16 | 10 |  |

**Supplementary Table 2 | Manganese-based adsorbent**

| Equilibrium time (h) | Adsorption capacity (mg g-1) | Adsorption rate (mg g-1 h-1) | Recycle | References |
| --- | --- | --- | --- | --- |
| 24 | 23.5 | 0.98 | Not mentioned | 8 |
| 72 | 40.9 | 0.57 | Not mentioned | 9 |
| 72 | 28.3 | 0.39 | 6 | 10 |
| 24 | 26.9 | 1.12 | Not mentioned | 11 |
| 24 | 27.2 | 1.13 | 10 | 12 |
| 120 | 59.4 | 0.50 | Not mentioned | 13 |
| 12 | 39 | 3.25 | Not mentioned | 14 |
| 12 | 37.6 | 3.13 | Not mentioned | 15 |
| 24 | 33.1 | 1.38 | 5 | 16 |
| 12 | 27.7 | 2.31 | 5 | 17 |
| 48 | 31.7 | 0.66 | 20 | 18 |
| Average | 34.11 | 1.40 | 9.2 |  |

**Supplementary Table 3 | Titanium-based adsorbent**

| Equilibrium time (h) | Adsorption capacity (mg g-1) | Adsorption rate (mg g-1 h-1) | Recycle | References |
| --- | --- | --- | --- | --- |
| 24 | 32.6 | 1.36 | Not mentioned | 19 |
| 24 | 21 | 0.88 | Not mentioned | 20 |
| 8 | 27.4 | 3.43 | 4 | 21 |
| 24 | 34.2 | 1.43 | 8 | 22 |
| 8 | 33.4 | 4.17 | Not mentioned | 23 |
| 24 | 34.4 | 1.43 | 5 | 24 |
| 24 | 52 | 2.17 | 5 | 24 |
| 24 | 39.5 | 1.65 | 6 | 25 |
| 48 | 34.8 | 0.73 | 9 | 26 |
| Average | 34.36 | 1.91 | 6.14 |  |

**Supplementary Table 4 | Lithium extraction by electrochemical electrode**

| Electrodes | Adsorption capacity (mg g-1) | Adsorption rate (mg g-1 h-1) | Recycle | References |
| --- | --- | --- | --- | --- |
| Ag//LFP | 38.9 | 3.86 | Not mentioned | 27 |
| LiMn2O4 film electrode | 26.1 | 13.05 | Not mentioned | 28 |
| λ-MnO2-PPy-PSS | 35.2 | 17.10 | 100 | 29 |
| LiFePO4 | 38.9 | 2.13 | Not mentioned | 30 |
| NiHCF//-MnO2 | 14.9 | 14.88 | 100 | 31 |
| NMMO/AC | 14.4 | 21.10 | 30 | 32 |
| LiMn2O4 flow-type system | 24 | 9.60 | Not mentioned | 33 |
| LiMn2O4@carbon fiber | 12 | 2.40 | 100 | 34 |
| AC//LNCM/rGO | 13.8 | 20.76 | 30 | 35 |
| LiMn2O4/Zn | 4.9 | 0.98 | 10 | 36 |
| Average | 22.31 | 10.59 | 61.67 |  |

1 Xu, R. *et al.* Continuous lithium extraction from brine by efficient redox-couple electrodialysis. *Matter*, doi:10.1016/j.matt.2024.07.014.

2 *Historical Data Set of Surface Meteorological Observation in China (Monthly value)*, <<https://data.cma.cn/data/detail/dataCode/A.0019.0001.S001.html>> (

3 Zhong, J., Lin, S. & Yu, J. Li+ adsorption performance and mechanism using lithium/aluminum layered double hydroxides in low grade brines. *Desalination* **505**, 114983, doi:<https://doi.org/10.1016/j.desal.2021.114983> (2021).

4 Chen, J., Lin, S. & Yu, J. High-selective cyclic adsorption and magnetic recovery performance of magnetic lithium-aluminum layered double hydroxides (MLDHs) in extracting Li+ from ultrahigh Mg/Li ratio brines. *Separation and Purification Technology* **255**, 117710, doi:<https://doi.org/10.1016/j.seppur.2020.117710> (2021).

5 Menzheres, L. T., Ryabtsev, A. D. & Mamylova, E. V. Synthesis of Selective Sorbent LiCl ⋅ 2Al(OH)3 ⋅ nH2O. *Theoretical Foundations of Chemical Engineering* **53**, 821-826, doi:10.1134/S0040579518050172 (2019).

6 Zhong, J., Lin, S. & Yu, J. Effects of excessive lithium deintercalation on Li+ adsorption performance and structural stability of lithium/aluminum layered double hydroxides. *Journal of Colloid and Interface Science* **572**, 107-113, doi:<https://doi.org/10.1016/j.jcis.2020.03.081> (2020).

7 Jiang, H., Zhang, S., Yang, Y. & Yu, J. Synergic and competitive adsorption of Li–Na–MgCl2 onto lithium–aluminum hydroxides. *Adsorption* **26**, 1039-1049, doi:10.1007/s10450-020-00208-5 (2020).

8 Wang, L., Ma, W., Liu, R., Li, H. Y. & Meng, C. G. Correlation between Li+ adsorption capacity and the preparation conditions of spinel lithium manganese precursor. *Solid State Ionics* **177**, 1421-1428, doi:<https://doi.org/10.1016/j.ssi.2006.07.019> (2006).

9 Chitrakar, R., Kanoh, H., Miyai, Y. & Ooi, K. Recovery of Lithium from Seawater Using Manganese Oxide Adsorbent (H1.6Mn1.6O4) Derived from Li1.6Mn1.6O4. *Industrial & Engineering Chemistry Research* **40**, 2054-2058, doi:10.1021/ie000911h (2001).

10 Xiao, J.-L., Sun, S.-Y., Wang, J., Li, P. & Yu, J.-G. Synthesis and Adsorption Properties of Li1.6Mn1.6O4 Spinel. *Industrial & Engineering Chemistry Research* **52**, 11967-11973, doi:10.1021/ie400691d (2013).

11 Sun, S.-Y., Xiao, J.-L., Wang, J., Song, X. & Yu, J.-G. Synthesis and Adsorption Properties of Li1.6Mn1.6O4 by a Combination of Redox Precipitation and Solid-Phase Reaction. *Industrial & Engineering Chemistry Research* **53**, 15517-15521, doi:10.1021/ie5004625 (2014).

12 Shi, X. *et al.* Synthesis and properties of Li1.6Mn1.6O4 and its adsorption application. *Hydrometallurgy* **110**, 99-106, doi:<https://doi.org/10.1016/j.hydromet.2011.09.004> (2011).

13 Zandevakili, S., Ranjbar, M. & Ehteshamzadeh, M. Synthesis of a nanostructure ion sieve with improved lithium adsorption capacity. *Micro & Nano Letters* **9**, 455-459, doi:<https://doi.org/10.1049/mnl.2014.0086> (2014).

14 Zhang, Q.-H., Li, S.-P., Sun, S.-Y., Yin, X.-S. & Yu, J.-G. Lithium selective adsorption on 1-D MnO2 nanostructure ion-sieve. *Advanced Powder Technology* **20**, 432-437, doi:<https://doi.org/10.1016/j.apt.2009.02.008> (2009).

15 Wang, L., Meng, C. G. & Ma, W. Study on Li+ uptake by lithium ion-sieve via the pH technique. *Colloids and Surfaces A: Physicochemical and Engineering Aspects* **334**, 34-39, doi:<https://doi.org/10.1016/j.colsurfa.2008.09.050> (2009).

16 Chung, K. S. *et al.* Preparation of ion-sieve type (H)[M0. 5Mn1. 5] O4 (M= Mg, Zn) and their lithium adsorption properties in seawater. *Solid State Phenomena* **124**, 739-742 (2007).

17 Chen, M. *et al.* Improved performance of Al-doped LiMn2O4 ion-sieves for Li+ adsorption. *Microporous and Mesoporous Materials* **261**, 29-34, doi:<https://doi.org/10.1016/j.micromeso.2017.10.058> (2018).

18 Gaifang, C. *et al.* Synthesis, Adsorption Properties and Stability of Cr-Doped Lithium Ion Sieve in Salt Lake Brine. *Bulletin of the Chemical Society of Japan* (2019).

19 Chitrakar, R., Makita, Y., Ooi, K. & Sonoda, A. Lithium recovery from salt lake brine by H2TiO3. *Dalton Transactions* **43**, 8933-8939, doi:10.1039/C4DT00467A (2014).

20 Chitrakar, R., Makita, Y., Ooi, K. & Sonoda, A. Lithium recovery from salt lake brine by H 2 TiO 3. *Dalton Transactions* **43**, 8933-8939 (2014).

21 Marthi, R. & Smith, Y. R. Application and limitations of a H2TiO3 – Diatomaceous earth composite synthesized from titania slag as a selective lithium adsorbent. *Separation and Purification Technology* **254**, 117580, doi:<https://doi.org/10.1016/j.seppur.2020.117580> (2021).

22 Li, X. *et al.* Taming wettability of lithium ion sieve via different TiO2 precursors for effective Li recovery from aqueous lithium resources. *Chemical Engineering Journal* **392**, 123731, doi:<https://doi.org/10.1016/j.cej.2019.123731> (2020).

23 Zhang, L.-Y., Liu, Y.-W., Huang, L. & Li, N. A novel study on preparation of H 2 TiO 3–lithium adsorbent with titanyl sulfate as titanium source by inorganic precipitation–peptization method. *RSC advances* **8**, 1385-1391 (2018).

24 Gu, D., Sun, W., Han, G., Cui, Q. & Wang, H. Lithium ion sieve synthesized via an improved solid state method and adsorption performance for West Taijinar Salt Lake brine. *Chemical Engineering Journal* **350**, 474-483, doi:<https://doi.org/10.1016/j.cej.2018.05.191> (2018).

25 Wang, S. *et al.* High adsorption performance of the Mo-doped titanium oxide sieve for lithium ions. *Hydrometallurgy* **187**, 30-37, doi:<https://doi.org/10.1016/j.hydromet.2019.05.004> (2019).

26 Wang, S., Chen, X., Zhang, Y., Zhang, Y. & Zheng, S. Lithium adsorption from brine by iron-doped titanium lithium ion sieves. *Particuology* **41**, 40-47, doi:<https://doi.org/10.1016/j.partic.2018.02.001> (2018).

27 Liu, X., Chen, X., Zhao, Z. & Liang, X. Effect of Na+ on Li extraction from brine using LiFePO4/FePO4 electrodes. *Hydrometallurgy* **146**, 24-28, doi:<https://doi.org/10.1016/j.hydromet.2014.03.010> (2014).

28 Xu, X. *et al.* A Self-Supported λ-MnO2 Film Electrode used for Electrochemical Lithium Recovery from Brines. *ChemPlusChem* **83**, 521-528, doi:<https://doi.org/10.1002/cplu.201800185> (2018).

29 Du, X. *et al.* A novel electroactive λ-MnO 2/PPy/PSS core–shell nanorod coated electrode for selective recovery of lithium ions at low concentration. *Journal of Materials Chemistry A* **4**, 13989-13996 (2016).

30 Liu, X., Chen, X., He, L. & Zhao, Z. Study on extraction of lithium from salt lake brine by membrane electrolysis. *Desalination* **376**, 35-40 (2015).

31 Trócoli, R., Erinmwingbovo, C. & La Mantia, F. Optimized Lithium Recovery from Brines by using an Electrochemical Ion-Pumping Process Based on λ-MnO2 and Nickel Hexacyanoferrate. *ChemElectroChem* **4**, 143-149, doi:<https://doi.org/10.1002/celc.201600509> (2017).

32 Zhao, X., Li, G., Feng, M. & Wang, Y. Semi-continuous electrochemical extraction of lithium from brine using CF-NMMO/AC asymmetric hybrid capacitors. *Electrochimica Acta* **331**, 135285, doi:<https://doi.org/10.1016/j.electacta.2019.135285> (2020).

33 Joo, H. *et al.* Application of a Flow-Type Electrochemical Lithium Recovery System with λ-MnO2/LiMn2O4: Experiment and Simulation. *ACS Sustainable Chemistry & Engineering* **8**, 9622-9631, doi:10.1021/acssuschemeng.9b07427 (2020).

34 Xu, W., He, L. & Zhao, Z. Lithium extraction from high Mg/Li brine via electrochemical intercalation/de-intercalation system using LiMn2O4 materials. *Desalination* **503**, 114935, doi:<https://doi.org/10.1016/j.desal.2021.114935> (2021).

35 Zhao, X. *et al.* Lithium extraction from brine in an ionic selective desalination battery. *Desalination* **481**, 114360, doi:<https://doi.org/10.1016/j.desal.2020.114360> (2020).

36 Kim, S., Kim, M., Woo, S., Kang, H. & Kim, S. Performance of ring oscillators composed of gate-all-around FETs with varying numbers of nanowire channels using TCAD simulation. *Current Applied Physics* **18**, 340-344, doi:<https://doi.org/10.1016/j.cap.2017.12.012> (2018).
